# Supplementary material for: Alcohol Consumption and Cardiovascular Disease: A Mendelian Randomization Study
Source: PubMed Central journal article supplement (PMC7299220; doi:10.1161/circgen.119.002814), 2020-05-05
Supplement: hcg-13-e002814-s001.pdf [file hcg-13-e002814-s001.pdf]

# SUPPLEMENTAL MATERIAL

## METHODS

### Data Sources

Detailed information on the data sources used in this Mendelian randomization (MR) study is available in Table I and Table II. In brief, summary statistics data for alcohol consumption, smoking initiation, and education were available from meta-analyses of genome-wide association studies conducted by the GWAS and Sequencing Consortium of Alcohol and Nicotine use (GSCAN)<sup>1</sup> and the Social Science Genetic Association Consortium (SSGAC).<sup>2</sup> The corresponding data for genetic associations with the cardiovascular diseases (CVDs) were obtained from the UK Biobank<sup>3</sup> and the following consortia: the MEGASTROKE Consortium with data on any stroke and ischemic stroke and its subtypes;<sup>4</sup> International Stroke Genetics Consortium (ISGC) with data on intracerebral hemorrhage;<sup>5</sup> the Coronary ARtery DIsease Genome-wide Replication and Meta-analysis plus The Coronary Artery Disease Genetics (CARDIoGRAMplusC4D) consortium with data on coronary artery disease;<sup>6</sup> and the Atrial Fibrillation Consortium (AFGen) with data on atrial fibrillation.<sup>7</sup> The datasets included mainly or only European-descent individuals, and most genetic association analyses were adjusted for principal components of ancestry and additionally for age and sex in some studies (Table I). From UK Biobank, we used data for systolic and diastolic pressure, serum lipids (high-density lipoprotein cholesterol, low-density lipoprotein cholesterol, and triglycerides), and all primary CVD outcomes except atrial fibrillation because participants of UK Biobank were included in the AFGen. UK Biobank participants were also included in the GSCAN and SSGAC but not in the MEGASTROKE Consortium or the CARDIoGRAMplusC4D consortium.

### Selection of Instrumental Variables

The GSCAN genome-wide association study identified 99 conditionally independent single-nucleotide polymorphisms (SNPs) associated with alcohol consumption (log-transformed alcoholic drinks per week) at the genome-wide significance threshold ( $P < 5 \times 10^{-8}$ ) in 941 280 individuals of European ancestry.<sup>1</sup> Linkage disequilibrium (defined as  $r^2 > 0.1$ ) between the SNPs was assessed using LDlink<sup>8</sup> and was found among four SNP pairs. The SNP within each correlated pair that had the weakest association with alcohol consumption was excluded, leaving 95 independent SNPs for further consideration. Up to five SNPs were unavailable in the primary CVD outcome datasets. A suitable proxy SNP ( $r^2 > 0.95$  with the specified SNP) was available for two SNPs. Hence, summarized data for 92 to 94 SNPs were used in the main analyses. Eighty-one SNPs were available for analyses of intracerebral hemorrhage in the International Stroke Genetics Consortium. The SNPs used as instrumental variables and their associations with the outcomes are shown in Tables III to VII.

### Statistical Analysis

Five complementary MR methods with distinct strengths and assumptions were used for the analyses of genetically-predicted alcohol consumption in relation to the eight primary CVD outcomes: (1) the inverse-variance weighted method (under a multiplicative random-effects model), which provides the highest precision but assumes that all SNPs are valid instrumental

variables<sup>9</sup>; (2) the weighted median method, which provides less precise estimates than the inverse-variance weighted method but gives reliable estimates if at least half of the weight in the analysis comes from valid instrumental variables<sup>9</sup>; (3) the MR-Egger method, which has low precision but can detect and correct for pleiotropy and provide a causal estimate even if all genetic variants have pleiotropic effects on the outcome<sup>9</sup>; (4) the MR-PRESSO (Pleiotropy RESidual Sum and Outlier) method, which can identify and correct for horizontal pleiotropy through removal of outliers;<sup>10</sup> and (5) a multivariable MR approach<sup>11</sup> to adjust for smoking initiation, which is genetically correlated with alcohol consumption ( $r_g=0.36$ ).<sup>1</sup> In multivariable MR, the outcome is regressed on genetically-predicted values of alcohol consumption and smoking initiation, meaning that estimates represent the direct effect of alcohol consumption that is not mediated via smoking initiation.<sup>12</sup> Summary statistics data for smoking initiation were obtained from the GSCAN.<sup>1</sup> We further conducted a sensitivity analysis by calculating genetic associations with CVDs in never smokers in UK Biobank. In the primary analyses of the consortia data for any stroke,<sup>4</sup> ischemic stroke,<sup>4</sup> and atrial fibrillation,<sup>7</sup> we used the multi-ancestry datasets to increase power. In sensitivity analyses, the European-only datasets were used. European-only data were not available from the CARDIoGRAMplusC4D consortium.<sup>6</sup> The dataset for intracerebral hemorrhage included individuals of European ancestry only.<sup>5</sup> The analyses were carried out using the *mrrobust*,<sup>13</sup> *MRPRESSO*<sup>10</sup> and *MendelianRandomization*<sup>14</sup> packages. In a further secondary analysis, rs1229984 (the SNP with the strongest association with alcohol intake) in the *ADH1B* gene was used as an instrumental variable for alcohol consumption. Furthermore, the analyses for the overall genetic instrument were repeated after exclusion of rs1229984. All reported results for alcohol consumption are scaled to a standard deviation increase of log-transformed drinks per week. Results for stroke and coronary artery disease based on the MEGASTROKE and CARDIoGRAMplusC4D consortia datasets were combined with the corresponding results from UK Biobank by using fixed-effects inverse-variance weighted meta-analysis. All statistical tests were two-sided. Bonferroni-corrected *P* values below 0.006 (where  $\alpha=0.05/8$  CVD outcomes) were considered strong evidence of associations and *P* values between 0.006 and 0.05 as suggestive evidence of associations.

### **Power Calculation and Instrumental Strength**

Statistical power was estimated by using a web-based application.<sup>15</sup> The power calculation, assuming a variance of 0.25% explained by the alcohol-associated SNPs<sup>1</sup>, showed that we had 80% power (at  $\alpha=0.05$ ) to detect an OR of 1.22 for any stroke, 1.21 for coronary artery disease, 1.24 for atrial fibrillation, 1.70 for heart failure, 1.50 for venous thromboembolism, 1.95 for peripheral artery disease, 2.20 for aortic valve stenosis and 2.70 for abdominal aortic aneurysm. The F-statistic estimated in UK Biobank was 29, indicating that the genetic instrument was sufficient strong to mitigate weak instrument bias.

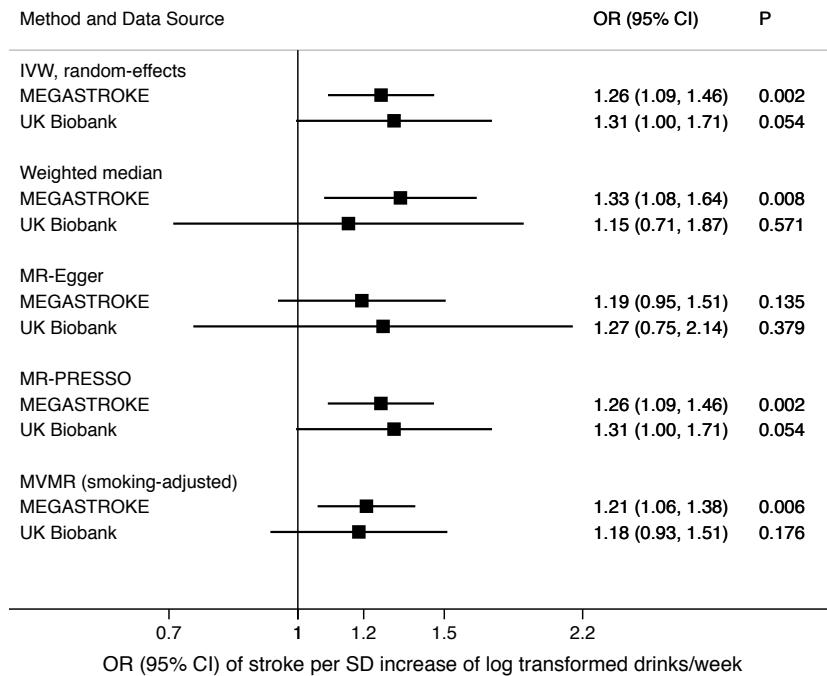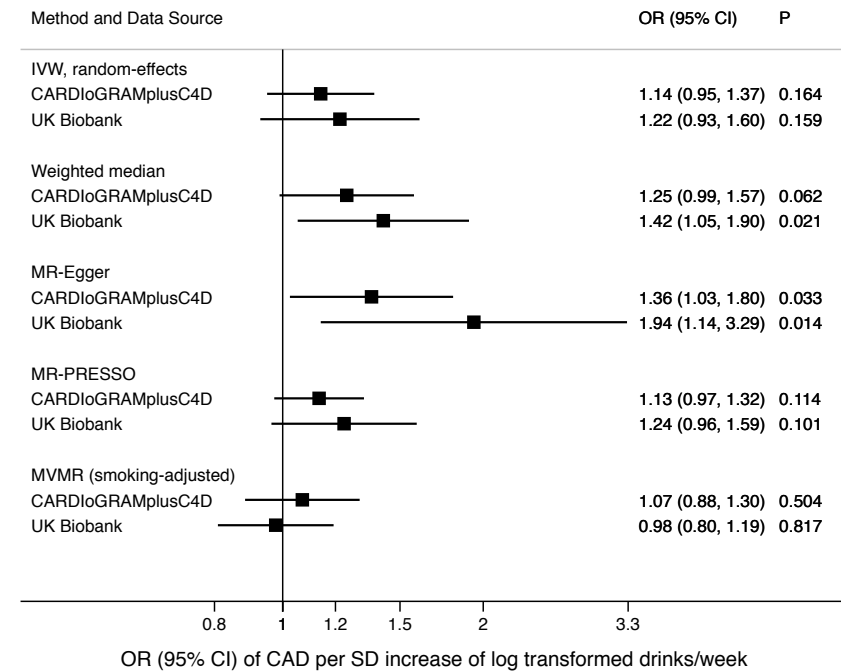

**Figure I.** Associations of alcohol consumption instrumented by the full set of single-nucleotide polymorphisms with stroke (left figure) and coronary artery disease (right figure) in Mendelian randomization analyses based on data from the MEGASTROKE and CARDIoGRAMplusC4D consortia and UK Biobank. Odds ratios are per one standard deviation increment of log transformed alcoholic drinks per week. CI, confidence interval; IVW, inverse-variance weighted; MR-PRESSO, Mendelian randomization Pleiotropy RESidual Sum and Outlier; MVMR, multivariable Mendelian randomization; OR, odds ratio.

**Table I. Details of the datasets used in the present Mendelian randomization study**

| <b>Exposure/Outcome(s)</b>                                               | <b>Consortium or cohort</b>                                        | <b>Participants</b>                                                                                                                                                                                                                       | <b>Exposure/Outcome definition</b>                                                                                                                                          | <b>Adjustments</b>                                     | <b>Web source</b>                                                                                             |
|--------------------------------------------------------------------------|--------------------------------------------------------------------|-------------------------------------------------------------------------------------------------------------------------------------------------------------------------------------------------------------------------------------------|-----------------------------------------------------------------------------------------------------------------------------------------------------------------------------|--------------------------------------------------------|---------------------------------------------------------------------------------------------------------------|
| Alcohol consumption (the exposure in this Mendelian randomization study) | GWAS and Sequencing Consortium of Alcohol and Nicotine use (GSCAN) | 941 280 European-descent individuals                                                                                                                                                                                                      | Average number of drinks consumed each week. Log-transformed prior to analysis                                                                                              | Age, age squared, sex and genetic principal components | <a href="https://conservancy.umn.edu/handle/11299/201564">https://conservancy.umn.edu/handle/11299/201564</a> |
| Smoking                                                                  | GWAS and Sequencing Consortium of Alcohol and Nicotine use (GSCAN) | 632 802 European-descent individuals                                                                                                                                                                                                      | Smoked over 100 cigarettes over the life course, ever smoked every day for at least a month, or ever smoked regularly                                                       | Age, age squared, sex and genetic principal components | <a href="https://conservancy.umn.edu/handle/11299/201564">https://conservancy.umn.edu/handle/11299/201564</a> |
| Education                                                                | Social Science Genetic Association Consortium (SSGAC)              | 766 345 European-descent individuals                                                                                                                                                                                                      | Number of years of schooling completed, constructed by imputing a years-of-education equivalent for each International Standard Classification of Education system category | Age, sex and genetic principal components              | <a href="https://www.thessgac.org/data">https://www.thessgac.org/data</a>                                     |
| Any stroke, ischemic stroke, and ischemic stroke subtypes                | MEGASTROKE Consortium                                              | 521 612 individuals (67 162 stroke cases and 454 450 non-cases) of mainly European (86%) and Asian (9%) ancestry; 60 341 cases of any ischemic stroke, 6688 large artery stroke, 11 710 small vessel stroke and 9006 cardioembolic stroke | The classification of ischemic stroke subtypes was based on the Trial of Org 10172 in Acute Stroke Treatment (TOAST) criteria                                               | Minimum of age and sex                                 | <a href="http://www.megastroke.org">http://www.megastroke.org</a>                                             |

|                                                           |                                                                                                                                            |                                                                                                                                                                                                                                          |                                                                                                                                                                          |                                                             |                                                                                                                                 |
|-----------------------------------------------------------|--------------------------------------------------------------------------------------------------------------------------------------------|------------------------------------------------------------------------------------------------------------------------------------------------------------------------------------------------------------------------------------------|--------------------------------------------------------------------------------------------------------------------------------------------------------------------------|-------------------------------------------------------------|---------------------------------------------------------------------------------------------------------------------------------|
| Intracerebral hemorrhage                                  | International Stroke Genetics Consortium (ISGC)                                                                                            | 1545 cases of intracerebral hemorrhage and 1481 controls of European ancestry                                                                                                                                                            | Spontaneous intracerebral hemorrhage was defined as a new and acute neurological deficit with compatible brain imaging showing the presence of intraparenchymal bleeding | Age, sex, and genetic principal components                  | <a href="http://cerebrovascularportal.org/informational/downloads">http://cerebrovascularportal.org/informational/downloads</a> |
| Coronary artery disease                                   | Coronary ARtery Disease Genome-wide Replication and Meta-analysis plus The Coronary Artery Disease Genetics (CARDIoGRAMplusC4D) consortium | 184 305 individuals (60 801 cases of coronary artery disease and 123 504 non-cases) of mainly European (77%) and Asian (19%) ancestry                                                                                                    | Myocardial infarction, acute coronary syndrome, chronic stable angina, or coronary stenosis >50%                                                                         | Information not available                                   | <a href="http://www.cardiogramplusc4d.org/">www.cardiogramplusc4d.org/</a>                                                      |
| Atrial fibrillation                                       | Atrial Fibrillation Consortium (AFGen)                                                                                                     | 588 190 individuals (65 446 atrial fibrillation cases and 522 744 non-cases) of mainly European (91%) and Asian (6%) ancestry                                                                                                            | Paroxysmal or permanent atrial fibrillation or atrial flutter                                                                                                            | Age, sex, genotyping array and genetic principal components | <a href="http://www.broadcvdi.org/home/portalHome">http://www.broadcvdi.org/home/portalHome</a>                                 |
| Any stroke, ischemic stroke, and ischemic stroke subtypes | MEGASTROKE Consortium                                                                                                                      | 521 612 individuals (67 162 stroke cases and 454450 non-cases) of mainly European (86%) and Asian (9%) ancestry; 60 341 cases of any ischemic stroke, 6688 large artery stroke, 11 710 small vessel stroke and 9006 cardioembolic stroke | The classification of ischemic stroke subtypes was based on the Trial of Org 10172 in Acute Stroke Treatment (TOAST) criteria                                            | Minimum of age and sex                                      | <a href="http://www.megastroke.org">http://www.megastroke.org</a>                                                               |

|                                                                                                                                                         |            |                                                                                                            |                |                                            |                                                                         |
|---------------------------------------------------------------------------------------------------------------------------------------------------------|------------|------------------------------------------------------------------------------------------------------------|----------------|--------------------------------------------|-------------------------------------------------------------------------|
| Stroke, coronary artery disease, heart failure, venous thromboembolism, peripheral artery disease, aortic valve stenosis, and abdominal aortic aneurysm | UK Biobank | 367 586 unrelated European-descent individuals. The number of cases is reported in Supplementary Table II. | See Table II   | The first ten genetic principal components | <a href="https://www.ukbiobank.ac.uk/">https://www.ukbiobank.ac.uk/</a> |
| Systolic and diastolic blood pressure, high-density and low-density lipoprotein cholesterol, triglycerides                                              | UK Biobank | 367 586 unrelated European-descent individuals                                                             | Not applicable | The first ten genetic principal components | <a href="https://www.ukbiobank.ac.uk/">https://www.ukbiobank.ac.uk/</a> |

**Table II. Definitions and sources of information for cardiovascular diseases in UK Biobank**

| Outcome                   | Cases  | ICD-9 diagnosis                                                             | ICD-10 diagnosis                                             | OPCS procedure                                                   | Self-report†       |
|---------------------------|--------|-----------------------------------------------------------------------------|--------------------------------------------------------------|------------------------------------------------------------------|--------------------|
| Any stroke                | 9652   | 430, 431, 434, 436                                                          | I60, I61, I63, I64                                           |                                                                  | 20002              |
| Ischemic stroke           | 4602   | 434, 436                                                                    | I63, I64                                                     |                                                                  | 20002              |
| Intracerebral hemorrhage  | 1064   | 431                                                                         | I61                                                          |                                                                  | 20002              |
| Subarachnoid hemorrhage   | 1084   | 430                                                                         | I60                                                          |                                                                  | 20002              |
| Coronary artery disease   | 29 278 | 410, 411, 412, 414.0, 414.8, 414.9                                          | I21, I22, I23, I24, I25.1, I25.2, I25.5, I25.6, I25.8, I25.9 | K40, K41, K42, K43, K44, K45, K46, K49, K50.1, K50.2, K50.4, K75 | 20002, 20004, 6150 |
| Heart failure             | 6712   | 402.01, 402.11, 402.91, 404.01, 404.11, 404.91, 404.03, 404.13, 404.93, 428 | I11.0, I13.0, I13.2, I50                                     |                                                                  | 20002              |
| Venous thromboembolism    | 14 097 | 415.1, 451.1, 452, 453.0, 453.4, 453.9                                      | I26, I80.1, I80.2, I81, I82.0                                | L90.2                                                            | 20002, 6152        |
| Peripheral artery disease | 3415   | 443.8, 443.9                                                                | I73.8, I73.9                                                 |                                                                  | 20002              |
| Aortic valve stenosis     | 2244   |                                                                             | I35.0, I35.2                                                 |                                                                  | 20002              |
| Abdominal aortic aneurysm | 1094   | 441.3, 441.4                                                                | I71.3, I71.4                                                 | L19.4, L19.5                                                     | 20002              |

ICD, International Classification of Disease; OPCS, Office of Population Censuses and Surveys Classification of Surgical Operations and Procedures. \*Follow-up for incident cases was until March 31, 2017 and date of death was recorded until February 14, 2018. †Numbers refer to data codes used in UK Biobank: 6150/6152 = Health condition diagnosed by doctor (self-reported); 6177 = Medication for health condition; 20002 = Non-cancer illness code (self-reported from interview with nurse); 20004 = Surgical operation code (self-reported from interview with nurse)

**Table III. Association between alcohol-related SNPs and any stroke in the MEGASTROKE Consortium\***

| SNP        | Chr | Gene                 | EA | NEA | Association with alcohol |       | Association with stroke |       |       |
|------------|-----|----------------------|----|-----|--------------------------|-------|-------------------------|-------|-------|
|            |     |                      |    |     | Beta†                    | SE    | Beta†                   | SE    | P     |
| rs10753661 | 1   | Intergenic           | G  | A   | 0,009                    | 0,002 | 0,016                   | 0,009 | 0,081 |
| rs12088813 | 1   | Intron:PDE4B         | A  | C   | 0,009                    | 0,002 | 0,008                   | 0,009 | 0,351 |
| rs28680958 | 1   | Intron:ZBTB37        | G  | A   | 0,011                    | 0,002 | 0,002                   | 0,009 | 0,865 |
| rs5024204  | 1   | Intron:PTGER3        | T  | A   | 0,010                    | 0,002 | 0,018                   | 0,008 | 0,034 |
| rs58107686 | 1   | Intron:PHC2          | C  | A   | 0,010                    | 0,002 | 0,012                   | 0,009 | 0,169 |
| rs705687   | 1   | Intergenic           | A  | G   | 0,011                    | 0,002 | 0,003                   | 0,009 | 0,754 |
| rs823114   | 1   | Intergenic           | A  | G   | 0,009                    | 0,002 | 0,008                   | 0,008 | 0,328 |
| rs11692435 | 2   | Nonsynonymous:ACTR1B | A  | G   | 0,017                    | 0,003 | 0,000                   | 0,017 | 0,988 |
| rs1260326  | 2   | Nonsynonymous:GCKR   | C  | T   | 0,021                    | 0,002 | -0,006                  | 0,009 | 0,464 |
| rs13024996 | 2   | Intron:ARHGAP15      | C  | A   | 0,011                    | 0,002 | 0,012                   | 0,009 | 0,176 |
| rs13032049 | 2   | Intron:WDPCP         | G  | A   | 0,010                    | 0,002 | -0,012                  | 0,009 | 0,185 |
| rs13383034 | 2   | Intron:LINC01833     | T  | C   | 0,015                    | 0,002 | -0,018                  | 0,009 | 0,037 |
| rs2178197  | 2   | Intron:GPN1          | A  | G   | 0,009                    | 0,002 | 0,009                   | 0,009 | 0,306 |
| rs56337305 | 2   | Intergenic           | T  | C   | 0,010                    | 0,002 | 0,003                   | 0,008 | 0,716 |
| rs72859280 | 2   | Intergenic           | T  | G   | 0,023                    | 0,004 | -0,020                  | 0,027 | 0,463 |
| rs77165542 | 2   | Intergenic           | C  | T   | 0,026                    | 0,004 | -0,019                  | 0,032 | 0,565 |
| rs828867   | 2   | Utr3:TET3            | A  | G   | 0,009                    | 0,002 | 0,000                   | 0,008 | 0,986 |
| rs13066454 | 3   | Intergenic           | C  | T   | 0,009                    | 0,002 | 0,003                   | 0,008 | 0,712 |
| rs13094887 | 3   | Intergenic           | A  | T   | 0,010                    | 0,002 | 0,021                   | 0,009 | 0,028 |
| rs2011092  | 3   | Intron:ZBTB38        | T  | C   | 0,009                    | 0,002 | 0,000                   | 0,009 | 0,967 |
| rs35894540 | 3   | Intron:CADM2         | T  | C   | 0,013                    | 0,002 | 0,013                   | 0,008 | 0,124 |
| rs60654199 | 3   | Intron:RASA2         | C  | A   | 0,017                    | 0,003 | -0,018                  | 0,014 | 0,190 |
| rs62250685 | 3   | Intron:CADM2         | A  | G   | 0,014                    | 0,002 | 0,012                   | 0,008 | 0,148 |
| rs6787172  | 3   | Intron:RSRC1         | T  | G   | 0,008                    | 0,002 | -0,009                  | 0,008 | 0,262 |
| rs9838144  | 3   | Intron:CPNE4         | G  | C   | 0,010                    | 0,002 | -0,008                  | 0,011 | 0,473 |



|             |   |                       |   |   |       |       |        |       |       |
|-------------|---|-----------------------|---|---|-------|-------|--------|-------|-------|
| rs10004020  | 4 | Intergenic            | A | G | 0,009 | 0,002 | -0,010 | 0,009 | 0,279 |
| rs10028756  | 4 | Intergenic            | G | A | 0,019 | 0,002 | -0,003 | 0,014 | 0,845 |
| rs113909752 | 4 | Intron:ADH1C          | C | T | 0,039 | 0,004 | 0,015  | 0,016 | 0,331 |
| rs11940694  | 4 | Intron:KLB            | G | A | 0,026 | 0,002 | 0,016  | 0,008 | 0,044 |
| rs1229984   | 4 | Nonsynonymous:ADH1B   | C | T | 0,151 | 0,004 | 0,043  | 0,017 | 0,014 |
| rs12499107  | 4 | Intergenic            | G | A | 0,013 | 0,002 | 0,014  | 0,011 | 0,216 |
| rs12651313  | 4 | Intergenic            | C | G | 0,009 | 0,002 | 0,010  | 0,008 | 0,230 |
| rs13107325  | 4 | Nonsynonymous:SLC39A8 | C | T | 0,028 | 0,003 | 0,001  | 0,019 | 0,980 |
| rs17029090  | 4 | Synonymous:C4orf17    | A | G | 0,049 | 0,005 | -0,016 | 0,018 | 0,363 |
| rs2165670   | 4 | Intergenic            | A | G | 0,023 | 0,002 | 0,037  | 0,014 | 0,007 |
| rs36052336  | 4 | Intron:ADH1C          | A | G | 0,018 | 0,003 | 0,002  | 0,020 | 0,912 |
| rs3748034   | 4 | Nonsynonymous:HGFAC   | G | T | 0,012 | 0,002 | -0,021 | 0,011 | 0,064 |
| rs4501255   | 4 | Intron:BEND4          | G | C | 0,011 | 0,002 | -0,007 | 0,010 | 0,499 |
| rs4690727   | 4 | Intron:INPP4B         | G | C | 0,011 | 0,002 | 0,001  | 0,009 | 0,912 |
| rs4699791   | 4 | Intergenic            | A | G | 0,019 | 0,003 | -0,001 | 0,013 | 0,926 |
| rs79139602  | 4 | Intron:C4orf17        | T | A | 0,060 | 0,005 | -0,009 | 0,016 | 0,555 |
| rs11739827  | 5 | Intron:TENM2          | G | T | 0,008 | 0,002 | 0,005  | 0,009 | 0,564 |
| rs12655091  | 5 | Intergenic            | G | A | 0,008 | 0,002 | -0,002 | 0,008 | 0,759 |
| rs4916723   | 5 | Intron:LINC00461      | A | C | 0,010 | 0,002 | -0,008 | 0,008 | 0,306 |
| rs55872084  | 5 | Intron:SGCD           | T | G | 0,010 | 0,002 | -0,005 | 0,010 | 0,630 |
| rs10085696  | 7 | Intron:AUTS2          | A | G | 0,011 | 0,002 | -0,004 | 0,010 | 0,684 |
| rs10236149  | 7 | Intron:ARPC1B         | A | G | 0,014 | 0,002 | 0,004  | 0,011 | 0,698 |
| rs35034355  | 7 | Intron:ORC5           | G | A | 0,008 | 0,002 | -0,011 | 0,008 | 0,192 |
| rs6460047   | 7 | Intergenic            | C | T | 0,012 | 0,002 | -0,010 | 0,011 | 0,366 |
| rs6951574   | 7 | Intergenic            | C | T | 0,013 | 0,002 | 0,001  | 0,010 | 0,893 |
| rs1217091   | 8 | Intergenic            | C | T | 0,012 | 0,002 | -0,013 | 0,011 | 0,243 |
| rs13250583  | 8 | Intergenic            | C | T | 0,010 | 0,002 | -0,003 | 0,009 | 0,770 |
| rs28601761  | 8 | Intergenic            | G | C | 0,009 | 0,002 | -0,005 | 0,008 | 0,519 |

|             |    |                          |   |   |       |       |        |       |       |
|-------------|----|--------------------------|---|---|-------|-------|--------|-------|-------|
| rs10978550  | 9  | Intergenic               | T | C | 0,012 | 0,002 | 0,015  | 0,010 | 0,130 |
| rs55932213  | 9  | Intergenic               | G | A | 0,010 | 0,002 | 0,015  | 0,009 | 0,101 |
| rs17665139  | 10 | Intergenic               | C | T | 0,012 | 0,002 | 0,003  | 0,012 | 0,822 |
| rs7074871   | 10 | Intergenic               | G | A | 0,009 | 0,002 | 0,006  | 0,009 | 0,479 |
| rs10750025  | 11 | Intergenic               | T | C | 0,010 | 0,002 | 0,010  | 0,009 | 0,257 |
| rs11030084  | 11 | Intron:BDNF-AS LINC00678 | C | T | 0,011 | 0,002 | 0,012  | 0,010 | 0,222 |
| rs12795042  | 11 | Intron:LOC646522         | A | C | 0,008 | 0,002 | -0,004 | 0,009 | 0,684 |
| rs1713676   | 11 | Intergenic               | A | G | 0,008 | 0,002 | 0,020  | 0,008 | 0,013 |
| rs4938230   | 11 | Intergenic               | A | C | 0,013 | 0,002 | -0,016 | 0,011 | 0,148 |
| rs56030824  | 11 | Intron:SPI1              | G | A | 0,012 | 0,002 | -0,010 | 0,008 | 0,217 |
| rs682011    | 11 | Intergenic               | C | T | 0,008 | 0,002 | -0,002 | 0,008 | 0,829 |
| rs7950166   | 11 | Intron:TRIM66            | C | T | 0,010 | 0,002 | 0,000  | 0,008 | 0,998 |
| rs10506274  | 12 | Intron:ACSS3             | G | T | 0,009 | 0,002 | 0,001  | 0,008 | 0,867 |
| rs10876188  | 12 | Intron:SLC4A8            | C | T | 0,008 | 0,002 | 0,016  | 0,008 | 0,060 |
| rs3809162   | 12 | Intergenic               | G | A | 0,009 | 0,002 | -0,022 | 0,008 | 0,007 |
| rs4842786   | 12 | Intergenic               | G | A | 0,009 | 0,002 | -0,008 | 0,008 | 0,357 |
| rs500321    | 13 | Intergenic               | A | T | 0,010 | 0,002 | 0,006  | 0,010 | 0,565 |
| rs1123285   | 14 | Intron:OTX2              | C | G | 0,009 | 0,002 | 0,012  | 0,009 | 0,145 |
| rs11625650  | 14 | Intron:KIF26A            | G | A | 0,010 | 0,002 | 0,002  | 0,012 | 0,890 |
| rs2180870   | 14 | Intron:ARID4A            | T | C | 0,012 | 0,002 | 0,013  | 0,013 | 0,312 |
| rs12907323  | 15 | Intron:AGBL1             | G | A | 0,009 | 0,002 | -0,002 | 0,008 | 0,829 |
| rs2472297   | 15 | Intergenic               | T | C | 0,011 | 0,002 | 0,000  | 0,011 | 0,982 |
| rs1104608   | 16 | Intergenic               | G | C | 0,011 | 0,002 | -0,003 | 0,009 | 0,739 |
| rs113443718 | 16 | Intron:SEZ6L2            | G | A | 0,010 | 0,002 | 0,020  | 0,010 | 0,034 |
| rs17177078  | 16 | Intron:TNRC6A            | C | T | 0,022 | 0,003 | 0,013  | 0,019 | 0,475 |
| rs2764771   | 16 | Intergenic               | A | G | 0,010 | 0,002 | 0,004  | 0,008 | 0,667 |
| rs378421    | 16 | Intergenic               | G | A | 0,011 | 0,002 | 0,019  | 0,011 | 0,078 |
| rs62044525  | 16 | Intergenic               | C | G | 0,012 | 0,002 | 0,003  | 0,012 | 0,783 |

|            |    |                                       |   |   |       |       |        |       |       |
|------------|----|---------------------------------------|---|---|-------|-------|--------|-------|-------|
| rs7185555  | 16 | Intergenic                            | G | C | 0,011 | 0,002 | 0,012  | 0,012 | 0,312 |
| rs79616692 | 16 | Intron:LINC01572                      | C | G | 0,016 | 0,002 | 0,005  | 0,015 | 0,754 |
| rs10438820 | 17 | Intron:RPTOR                          | T | C | 0,009 | 0,002 | 0,013  | 0,008 | 0,125 |
| rs2854334  | 17 | Intergenic                            | G | A | 0,009 | 0,002 | -0,001 | 0,008 | 0,899 |
| rs3803800  | 17 | Nonsynonymous:TNFSF12-TNFSF13 TNFSF13 | G | A | 0,011 | 0,002 | -0,008 | 0,009 | 0,418 |
| rs4548913  | 17 | Intron:SRR                            | G | A | 0,008 | 0,002 | 0,015  | 0,008 | 0,075 |
| rs4092465  | 18 | Intergenic                            | A | G | 0,008 | 0,002 | 0,000  | 0,009 | 0,999 |
| rs9950000  | 18 | Intron:TCF4                           | C | T | 0,009 | 0,002 | 0,014  | 0,008 | 0,077 |
| rs281379   | 19 | Intergenic                            | A | G | 0,014 | 0,002 | 0,021  | 0,009 | 0,015 |
| rs4815364  | 20 | Intron:ACSS1                          | A | G | 0,009 | 0,002 | 0,015  | 0,008 | 0,067 |
| rs9607814  | 22 | Intergenic                            | C | A | 0,010 | 0,002 | -0,003 | 0,011 | 0,792 |

\*Data are from genome-wide association studies on alcohol consumption<sup>1</sup> and stroke.<sup>4</sup> †The betas for alcohol consumption are per SD increase of log-transformed drinks per week. The betas for stroke are the log odds ratios.

**Table IV. Association between alcohol-related SNPs and intracerebral hemorrhage in the International Stroke Genetics Consortium\***

| SNP         | Chr | Gene                 | EA | NEA | Association with alcohol |       |          | Association with intracerebral hemorrhage |       |       |
|-------------|-----|----------------------|----|-----|--------------------------|-------|----------|-------------------------------------------|-------|-------|
|             |     |                      |    |     | Beta†                    | SE    | P        | Beta†                                     | SE    | P     |
| rs10753661  | 1   | Intergenic           | G  | A   | 0,009                    | 0,002 | 3,76E-08 | -0,068                                    | 0,055 | 0,218 |
| rs12088813  | 1   | Intron:PDE4B         | A  | C   | 0,009                    | 0,002 | 1,58E-08 | 0,160                                     | 0,059 | 0,006 |
| rs28680958  | 1   | Intron:ZBTB37        | G  | A   | 0,011                    | 0,002 | 5,13E-10 | 0,083                                     | 0,060 | 0,171 |
| rs5024204   | 1   | Intron:PTGER3        | T  | A   | 0,010                    | 0,002 | 2,55E-09 | 0,004                                     | 0,057 | 0,939 |
| rs58107686  | 1   | Intron:PHC2          | C  | A   | 0,010                    | 0,002 | 7,79E-10 | 0,049                                     | 0,054 | 0,365 |
| rs705687    | 1   | Intergenic           | A  | G   | 0,011                    | 0,002 | 8,15E-10 | -0,137                                    | 0,064 | 0,032 |
| rs823114    | 1   | Intergenic           | A  | G   | 0,009                    | 0,002 | 2,31E-09 | 0,057                                     | 0,051 | 0,267 |
| rs1260326   | 2   | Nonsynonymous:GCKR   | C  | T   | 0,021                    | 0,002 | 8,05E-45 | 0,004                                     | 0,052 | 0,946 |
| rs13024996  | 2   | Intron:ARHGAP15      | C  | A   | 0,011                    | 0,002 | 5,72E-13 | 0,072                                     | 0,054 | 0,183 |
| rs13032049  | 2   | Intron:WDPCP         | G  | A   | 0,010                    | 0,002 | 3,00E-10 | 0,050                                     | 0,056 | 0,378 |
| rs17424787  | 2   | Nonsynonymous:ACTR1B | A  | G   | 0,017                    | 0,003 | 2,53E-11 | 0,008                                     | 0,096 | 0,932 |
| rs2178197   | 2   | Intron:GPN1          | A  | G   | 0,009                    | 0,002 | 2,45E-09 | 0,136                                     | 0,052 | 0,009 |
| rs72859280  | 2   | Intergenic           | T  | G   | 0,023                    | 0,004 | 4,44E-09 | -0,110                                    | 0,152 | 0,470 |
| rs7594223   | 2   | Intergenic           | T  | C   | 0,010                    | 0,002 | 1,63E-10 | 0,016                                     | 0,053 | 0,755 |
| rs13066454  | 3   | Intergenic           | C  | T   | 0,009                    | 0,002 | 4,13E-09 | 0,037                                     | 0,052 | 0,477 |
| rs2011092   | 3   | Intron:ZBTB38        | T  | C   | 0,009                    | 0,002 | 7,35E-09 | 0,017                                     | 0,054 | 0,756 |
| rs35012514  | 3   | Intergenic           | A  | T   | 0,010                    | 0,002 | 8,57E-11 | -0,097                                    | 0,054 | 0,072 |
| rs35894540  | 3   | Intron:CADM2         | T  | C   | 0,013                    | 0,002 | 1,58E-14 | -0,066                                    | 0,053 | 0,208 |
| rs60654199  | 3   | Intron:RSA2          | C  | A   | 0,017                    | 0,003 | 2,85E-08 | -0,200                                    | 0,120 | 0,095 |
| rs62250685  | 3   | Intron:CADM2         | A  | G   | 0,014                    | 0,002 | 1,05E-21 | -0,070                                    | 0,053 | 0,187 |
| rs6787172   | 3   | Intron:RSRC1         | T  | G   | 0,008                    | 0,002 | 4,27E-08 | -0,005                                    | 0,052 | 0,925 |
| rs9858200   | 3   | Intron:CPNE4         | G  | A   | 0,010                    | 0,002 | 2,65E-08 | 0,064                                     | 0,061 | 0,293 |
| rs10004020  | 4   | Intergenic           | A  | G   | 0,009                    | 0,002 | 2,43E-08 | 0,020                                     | 0,056 | 0,728 |
| rs10028756  | 4   | Intergenic           | G  | A   | 0,019                    | 0,002 | 1,16E-17 | 0,008                                     | 0,076 | 0,918 |
| rs11097708  | 4   | Intergenic           | T  | C   | 0,019                    | 0,003 | 6,58E-14 | -0,051                                    | 0,089 | 0,570 |
| rs113909752 | 4   | Intron:ADH1C         | C  | T   | 0,039                    | 0,004 | 6,56E-27 | 0,192                                     | 0,104 | 0,064 |

|            |    |                          |   |   |       |       |          |  |        |       |       |
|------------|----|--------------------------|---|---|-------|-------|----------|--|--------|-------|-------|
| rs11940694 | 4  | Intron:KLB               | G | A | 0,026 | 0,002 | 3,03E-68 |  | 0,064  | 0,053 | 0,230 |
| rs12499107 | 4  | Intergenic               | G | A | 0,013 | 0,002 | 4,45E-09 |  | 0,001  | 0,079 | 0,994 |
| rs12651313 | 4  | Intergenic               | C | G | 0,009 | 0,002 | 3,79E-09 |  | 0,049  | 0,052 | 0,345 |
| rs17029090 | 4  | Synonymous:C4orf17       | A | G | 0,049 | 0,005 | 4,75E-21 |  | 0,351  | 0,193 | 0,068 |
| rs2165670  | 4  | Intergenic               | A | G | 0,023 | 0,002 | 1,67E-22 |  | 0,020  | 0,084 | 0,809 |
| rs36052336 | 4  | Intron:ADH1C             | A | G | 0,018 | 0,003 | 1,23E-09 |  | 0,141  | 0,113 | 0,212 |
| rs4501255  | 4  | Intron:BEND4             | G | C | 0,011 | 0,002 | 4,83E-10 |  | -0,043 | 0,060 | 0,478 |
| rs4690727  | 4  | Intron:INPP4B            | G | C | 0,011 | 0,002 | 2,43E-11 |  | -0,052 | 0,057 | 0,367 |
| rs79139602 | 4  | Intron:C4orf17           | T | A | 0,060 | 0,005 | 1,80E-32 |  | -0,523 | 0,181 | 0,004 |
| rs11739827 | 5  | Intron:TENM2             | G | T | 0,008 | 0,002 | 1,18E-08 |  | -0,008 | 0,052 | 0,881 |
| rs12655091 | 5  | Intergenic               | G | A | 0,008 | 0,002 | 1,25E-08 |  | 0,015  | 0,052 | 0,778 |
| rs17422060 | 5  | Intron:LINC00461         | T | G | 0,010 | 0,002 | 1,72E-11 |  | -0,036 | 0,053 | 0,498 |
| rs55872084 | 5  | Intron:SGCD              | T | G | 0,010 | 0,002 | 6,32E-09 |  | 0,015  | 0,061 | 0,803 |
| rs10085696 | 7  | Intron:AUTS2             | A | G | 0,011 | 0,002 | 1,12E-09 |  | 0,071  | 0,067 | 0,286 |
| rs10236149 | 7  | Intron:ARPC1B            | A | G | 0,014 | 0,002 | 1,18E-09 |  | -0,101 | 0,080 | 0,203 |
| rs2533125  | 7  | Intergenic               | G | A | 0,013 | 0,002 | 1,58E-19 |  | 0,022  | 0,052 | 0,677 |
| rs35034355 | 7  | Intron:ORC5              | G | A | 0,008 | 0,002 | 2,87E-08 |  | 0,061  | 0,051 | 0,233 |
| rs6460047  | 7  | Intergenic               | C | T | 0,012 | 0,002 | 9,69E-11 |  | -0,012 | 0,063 | 0,852 |
| rs1217091  | 8  | Intergenic               | C | T | 0,012 | 0,002 | 7,05E-11 |  | 0,014  | 0,065 | 0,833 |
| rs13250583 | 8  | Intergenic               | C | T | 0,010 | 0,002 | 4,70E-08 |  | -0,033 | 0,063 | 0,603 |
| rs28601761 | 8  | Intergenic               | G | C | 0,009 | 0,002 | 7,17E-10 |  | -0,060 | 0,053 | 0,262 |
| rs10978550 | 9  | Intergenic               | T | C | 0,012 | 0,002 | 7,15E-11 |  | -0,013 | 0,062 | 0,833 |
| rs17665139 | 10 | Intergenic               | C | T | 0,012 | 0,002 | 1,59E-08 |  | 0,106  | 0,072 | 0,143 |
| rs7074871  | 10 | Intergenic               | G | A | 0,009 | 0,002 | 1,86E-08 |  | 0,033  | 0,060 | 0,575 |
| rs11030084 | 11 | Intron:BDNF-AS LINC00678 | C | T | 0,011 | 0,002 | 1,72E-08 |  | -0,014 | 0,067 | 0,838 |
| rs1713676  | 11 | Intergenic               | A | G | 0,008 | 0,002 | 4,29E-08 |  | -0,009 | 0,051 | 0,856 |
| rs4309187  | 11 | Intergenic               | C | A | 0,010 | 0,002 | 4,89E-11 |  | 0,043  | 0,056 | 0,437 |
| rs4938230  | 11 | Intergenic               | A | C | 0,013 | 0,002 | 1,48E-10 |  | -0,090 | 0,068 | 0,188 |

|            |    |                        |   |   |       |       |          |        |       |       |
|------------|----|------------------------|---|---|-------|-------|----------|--------|-------|-------|
| rs530647   | 11 | Intergenic             | G | C | 0,008 | 0,002 | 2,22E-08 | 0,107  | 0,052 | 0,039 |
| rs56030824 | 11 | Intron:SPI1            | G | A | 0,012 | 0,002 | 1,15E-13 | -0,044 | 0,055 | 0,418 |
| rs7950166  | 11 | Intron:TRIM66          | C | T | 0,010 | 0,002 | 9,89E-11 | 0,061  | 0,054 | 0,253 |
| rs10506274 | 12 | Intron:ACSS3           | G | T | 0,009 | 0,002 | 5,78E-10 | 0,087  | 0,051 | 0,087 |
| rs10876188 | 12 | Intron:SLC4A8          | C | T | 0,008 | 0,002 | 4,84E-08 | -0,030 | 0,051 | 0,554 |
| rs3809162  | 12 | Intergenic             | G | A | 0,009 | 0,002 | 1,19E-09 | 0,040  | 0,053 | 0,455 |
| rs4842786  | 12 | Intergenic             | G | A | 0,009 | 0,002 | 2,73E-09 | -0,019 | 0,052 | 0,720 |
| rs574593   | 13 | Intergenic             | T | C | 0,010 | 0,002 | 4,92E-09 | -0,151 | 0,058 | 0,009 |
| rs2180870  | 14 | Intron:ARID4A          | T | C | 0,012 | 0,002 | 1,12E-08 | 0,223  | 0,077 | 0,004 |
| rs28929474 | 14 | Nonsynonymous:SERPINA1 | C | T | 0,037 | 0,005 | 1,34E-11 | -0,002 | 0,187 | 0,992 |
| rs962961   | 14 | Intron:OTX2            | C | T | 0,009 | 0,002 | 8,14E-09 | 0,033  | 0,055 | 0,552 |
| rs12907323 | 15 | Intron:AGBL1           | G | A | 0,009 | 0,002 | 9,93E-09 | 0,002  | 0,052 | 0,966 |
| rs2472297  | 15 | Intergenic             | T | C | 0,011 | 0,002 | 3,1E-10  | 0,071  | 0,063 | 0,259 |
| rs11641912 | 16 | Intergenic             | A | G | 0,011 | 0,002 | 4,24E-08 | 0,177  | 0,071 | 0,013 |
| rs12930239 | 16 | Intron:SEZ6L2          | C | G | 0,010 | 0,002 | 1,19E-10 | -0,056 | 0,055 | 0,306 |
| rs17177078 | 16 | Intron:TNRC6A          | C | T | 0,022 | 0,003 | 1,27E-13 | 0,109  | 0,102 | 0,286 |
| rs2764771  | 16 | Intergenic             | A | G | 0,010 | 0,002 | 4,02E-10 | 0,024  | 0,056 | 0,663 |
| rs35626515 | 16 | Intergenic             | C | A | 0,011 | 0,002 | 4,83E-14 | 0,102  | 0,054 | 0,058 |
| rs62044525 | 16 | Intergenic             | C | G | 0,012 | 0,002 | 1,03E-10 | -0,042 | 0,066 | 0,528 |
| rs79616692 | 16 | Intron:LINC01572       | C | G | 0,016 | 0,002 | 4,11E-12 | 0,012  | 0,083 | 0,884 |
| rs10438820 | 17 | Intron:RPTOR           | T | C | 0,009 | 0,002 | 1,76E-08 | 0,083  | 0,058 | 0,149 |
| rs216197   | 17 | Intron:SRR             | A | G | 0,008 | 0,002 | 3,11E-08 | 0,037  | 0,054 | 0,489 |
| rs2854334  | 17 | Intergenic             | G | A | 0,009 | 0,002 | 7,51E-10 | 0,006  | 0,053 | 0,908 |
| rs9950000  | 18 | Intron:TCF4            | C | T | 0,009 | 0,002 | 9,38E-10 | 0,023  | 0,052 | 0,663 |
| rs281379   | 19 | Intergenic             | A | G | 0,014 | 0,002 | 4,91E-21 | -0,014 | 0,052 | 0,783 |
| rs2387577  | 20 | Intron:ACSS1           | C | G | 0,009 | 0,002 | 1,02E-08 | 0,042  | 0,055 | 0,445 |
| rs9607814  | 22 | Intergenic             | C | A | 0,010 | 0,002 | 4,31E-08 | -0,031 | 0,065 | 0,631 |

\*Data are from genome-wide association studies on alcohol consumption<sup>1</sup> and intracerebral hemorrhage.<sup>5</sup> †The betas for alcohol consumption are per SD increase of log transformed drinks per week. The betas for intracerebral hemorrhage are log odds ratios.

**Table V. Association between alcohol-related SNPs and coronary artery disease in the CARDIoGRAMplusC4D consortium\***

| SNP        | Chr | Gene                 | EA | NEA | Associations with alcohol |       |          | Associations with CAD |       |       |
|------------|-----|----------------------|----|-----|---------------------------|-------|----------|-----------------------|-------|-------|
|            |     |                      |    |     | Beta†                     | SE    | P        | Beta†                 | SE    | P     |
| rs10753661 | 1   | Intergenic           | G  | A   | 0,009                     | 0,002 | 3,76E-08 | 0,015                 | 0,011 | 0,174 |
| rs12088813 | 1   | Intron:PDE4B         | A  | C   | 0,009                     | 0,002 | 1,58E-08 | 0,021                 | 0,010 | 0,039 |
| rs28680958 | 1   | Intron:ZBTB37        | G  | A   | 0,011                     | 0,002 | 5,13E-10 | -0,004                | 0,011 | 0,744 |
| rs5024204  | 1   | Intron:PTGER3        | T  | A   | 0,010                     | 0,002 | 2,55E-09 | -0,011                | 0,010 | 0,267 |
| rs58107686 | 1   | Intron:PHC2          | C  | A   | 0,010                     | 0,002 | 7,79E-10 | -0,001                | 0,010 | 0,897 |
| rs705687   | 1   | Intergenic           | A  | G   | 0,011                     | 0,002 | 8,15E-10 | 0,002                 | 0,011 | 0,830 |
| rs823114   | 1   | Intergenic           | A  | G   | 0,009                     | 0,002 | 2,31E-09 | -0,010                | 0,009 | 0,262 |
| rs11692435 | 2   | Nonsynonymous:ACTR1B | A  | G   | 0,017                     | 0,003 | 2,53E-11 | 0,024                 | 0,020 | 0,218 |
| rs1260326  | 2   | Nonsynonymous:GCKR   | C  | T   | 0,021                     | 0,002 | 8,05E-45 | 0,003                 | 0,010 | 0,735 |
| rs13024996 | 2   | Intron:ARHGAP15      | C  | A   | 0,011                     | 0,002 | 5,72E-13 | 0,001                 | 0,011 | 0,933 |
| rs13032049 | 2   | Intron:WDPCP         | G  | A   | 0,010                     | 0,002 | 3,00E-10 | -0,019                | 0,011 | 0,069 |
| rs13383034 | 2   | Intron:LINC01833     | T  | C   | 0,015                     | 0,002 | 6,31E-22 | -0,002                | 0,010 | 0,813 |
| rs2178197  | 2   | Intron:GPN1          | A  | G   | 0,009                     | 0,002 | 2,45E-09 | 0,001                 | 0,009 | 0,942 |
| rs56337305 | 2   | Intergenic           | T  | C   | 0,010                     | 0,002 | 1,63E-10 | 0,013                 | 0,010 | 0,206 |
| rs72859280 | 2   | Intergenic           | T  | G   | 0,023                     | 0,004 | 4,44E-09 | 0,028                 | 0,028 | 0,317 |
| rs77165542 | 2   | Intergenic           | C  | T   | 0,026                     | 0,004 | 5,63E-11 | 0,060                 | 0,041 | 0,146 |
| rs828867   | 2   | Utr3:TET3            | A  | G   | 0,009                     | 0,002 | 2,15E-09 | 0,003                 | 0,010 | 0,758 |
| rs13066454 | 3   | Intergenic           | C  | T   | 0,009                     | 0,002 | 4,13E-09 | -0,005                | 0,010 | 0,576 |
| rs13094887 | 3   | Intergenic           | A  | T   | 0,010                     | 0,002 | 8,57E-11 | 0,021                 | 0,011 | 0,057 |
| rs2011092  | 3   | Intron:ZBTB38        | T  | C   | 0,009                     | 0,002 | 7,35E-09 | 0,019                 | 0,011 | 0,078 |
| rs35894540 | 3   | Intron:CADM2         | T  | C   | 0,013                     | 0,002 | 1,58E-14 | -0,002                | 0,010 | 0,818 |
| rs60654199 | 3   | Intron:RASA2         | C  | A   | 0,017                     | 0,003 | 2,85E-08 | -0,027                | 0,018 | 0,134 |
| rs62250685 | 3   | Intron:CADM2         | A  | G   | 0,014                     | 0,002 | 1,05E-21 | -0,003                | 0,010 | 0,741 |
| rs6787172  | 3   | Intron:RSRC1         | T  | G   | 0,008                     | 0,002 | 4,27E-08 | -0,001                | 0,009 | 0,936 |
| rs9838144  | 3   | Intron:CPNE4         | G  | C   | 0,010                     | 0,002 | 2,65E-08 | -0,014                | 0,012 | 0,270 |

|             |   |                       |   |   |       |       |           |        |       |       |
|-------------|---|-----------------------|---|---|-------|-------|-----------|--------|-------|-------|
| rs10004020  | 4 | Intergenic            | A | G | 0,009 | 0,002 | 2,43E-08  | 0,000  | 0,010 | 0,971 |
| rs10028756  | 4 | Intergenic            | G | A | 0,019 | 0,002 | 1,16E-17  | -0,016 | 0,014 | 0,251 |
| rs113909752 | 4 | Intron:ADH1C          | C | T | 0,039 | 0,004 | 6,56E-27  | 0,014  | 0,018 | 0,430 |
| rs11940694  | 4 | Intron:KLB            | G | A | 0,026 | 0,002 | 3,03E-68  | 0,012  | 0,009 | 0,204 |
| rs1229984   | 4 | Nonsynonymous:ADH1B   | C | T | 0,151 | 0,004 | <2,2e-308 | 0,033  | 0,019 | 0,075 |
| rs12499107  | 4 | Intergenic            | G | A | 0,013 | 0,002 | 4,45E-09  | -0,012 | 0,013 | 0,345 |
| rs12651313  | 4 | Intergenic            | C | G | 0,009 | 0,002 | 3,79E-09  | 0,005  | 0,010 | 0,637 |
| rs13107325  | 4 | Nonsynonymous:SLC39A8 | C | T | 0,028 | 0,003 | 1,53E-22  | 0,007  | 0,022 | 0,765 |
| rs17029090  | 4 | Synonymous:C4orf17    | A | G | 0,049 | 0,005 | 4,75E-21  | -0,049 | 0,025 | 0,045 |
| rs2165670   | 4 | Intergenic            | A | G | 0,023 | 0,002 | 1,67E-22  | 0,016  | 0,015 | 0,293 |
| rs36052336  | 4 | Intron:ADH1C          | A | G | 0,018 | 0,003 | 1,23E-09  | -0,005 | 0,022 | 0,823 |
| rs3748034   | 4 | Nonsynonymous:HGFAC   | G | T | 0,012 | 0,002 | 1,67E-08  | -0,001 | 0,014 | 0,954 |
| rs4501255   | 4 | Intron:BEND4          | G | C | 0,011 | 0,002 | 4,83E-10  | 0,011  | 0,012 | 0,365 |
| rs4690727   | 4 | Intron:INPP4B         | G | C | 0,011 | 0,002 | 2,43E-11  | -0,002 | 0,010 | 0,820 |
| rs4699791   | 4 | Intergenic            | A | G | 0,019 | 0,003 | 6,58E-14  | 0,013  | 0,015 | 0,377 |
| rs79139602  | 4 | Intron:C4orf17        | T | A | 0,060 | 0,005 | 1,80E-32  | 0,047  | 0,022 | 0,035 |
| rs11739827  | 5 | Intron:TENM2          | G | T | 0,008 | 0,002 | 1,18E-08  | -0,010 | 0,009 | 0,295 |
| rs12655091  | 5 | Intergenic            | G | A | 0,008 | 0,002 | 1,25E-08  | -0,016 | 0,009 | 0,083 |
| rs4916723   | 5 | Intron:LINC00461      | A | C | 0,010 | 0,002 | 1,72E-11  | -0,018 | 0,010 | 0,068 |
| rs55872084  | 5 | Intron:SGCD           | T | G | 0,010 | 0,002 | 6,32E-09  | -0,010 | 0,011 | 0,401 |
| rs10085696  | 7 | Intron:AUTS2          | A | G | 0,011 | 0,002 | 1,12E-09  | -,0090 | 0,011 | 0,431 |
| rs10236149  | 7 | Intron:ARPC1B         | A | G | 0,014 | 0,002 | 1,18E-09  | 0,013  | 0,013 | 0,303 |
| rs35034355  | 7 | Intron:ORC5           | G | A | 0,008 | 0,002 | 2,87E-08  | -0,001 | 0,009 | 0,895 |
| rs6460047   | 7 | Intergenic            | C | T | 0,012 | 0,002 | 9,69E-11  | -0,002 | 0,012 | 0,867 |
| rs6951574   | 7 | Intergenic            | C | T | 0,013 | 0,002 | 1,58E-19  | 0,015  | 0,012 | 0,225 |
| rs1217091   | 8 | Intergenic            | C | T | 0,012 | 0,002 | 7,05E-11  | 0,008  | 0,013 | 0,515 |
| rs13250583  | 8 | Intergenic            | C | T | 0,010 | 0,002 | 4,70E-8   | 0,001  | 0,011 | 0,950 |
| rs28601761  | 8 | Intergenic            | G | C | 0,009 | 0,002 | 7,17E-10  | -0,048 | 0,010 | 0,000 |



|             |    |                          |   |   |       |       |          |        |       |       |
|-------------|----|--------------------------|---|---|-------|-------|----------|--------|-------|-------|
| rs10978550  | 9  | Intergenic               | T | C | 0,012 | 0,002 | 7,15E-11 | 0,013  | 0,012 | 0,277 |
| rs55932213  | 9  | Intergenic               | G | A | 0,010 | 0,002 | 9,55E-09 | 0,004  | 0,011 | 0,692 |
| rs17665139  | 10 | Intergenic               | C | T | 0,012 | 0,002 | 1,59E-08 | -0,010 | 0,015 | 0,492 |
| rs7074871   | 10 | Intergenic               | G | A | 0,009 | 0,002 | 1,86E-08 | -0,009 | 0,011 | 0,372 |
| rs10750025  | 11 | Intergenic               | T | C | 0,010 | 0,002 | 4,89E-11 | 0,003  | 0,011 | 0,791 |
| rs11030084  | 11 | Intron:BDNF-AS LINC00678 | C | T | 0,011 | 0,002 | 1,72E-08 | 0,031  | 0,012 | 0,008 |
| rs12795042  | 11 | Intron:LOC646522         | A | C | 0,008 | 0,002 | 3,25E-08 | 0,006  | 0,010 | 0,556 |
| rs1713676   | 11 | Intergenic               | A | G | 0,008 | 0,002 | 4,29E-08 | 0,006  | 0,009 | 0,542 |
| rs4938230   | 11 | Intergenic               | A | C | 0,013 | 0,002 | 1,48E-10 | 0,009  | 0,012 | 0,442 |
| rs56030824  | 11 | Intron:SPI1              | G | A | 0,012 | 0,002 | 1,15E-13 | 0,008  | 0,010 | 0,416 |
| rs682011    | 11 | Intergenic               | C | T | 0,008 | 0,002 | 2,22E-08 | -0,002 | 0,010 | 0,829 |
| rs7950166   | 11 | Intron:TRIM66            | C | T | 0,010 | 0,002 | 9,89E-11 | -0,015 | 0,010 | 0,114 |
| rs10506274  | 12 | Intron:ACSS3             | G | T | 0,009 | 0,002 | 5,78E-10 | -0,017 | 0,009 | 0,074 |
| rs10876188  | 12 | Intron:SLC4A8            | C | T | 0,008 | 0,002 | 4,84E-08 | 0,007  | 0,010 | 0,450 |
| rs3809162   | 12 | Intergenic               | G | A | 0,009 | 0,002 | 1,19E-09 | -0,016 | 0,010 | 0,090 |
| rs4842786   | 12 | Intergenic               | G | A | 0,009 | 0,002 | 2,73E-09 | -0,001 | 0,010 | 0,892 |
| rs500321    | 13 | Intergenic               | A | T | 0,010 | 0,002 | 4,92E-09 | 0,010  | 0,011 | 0,385 |
| rs1123285   | 14 | Intron:OTX2              | C | G | 0,009 | 0,002 | 8,14E-09 | 0,006  | 0,010 | 0,585 |
| rs11625650  | 14 | Intron:KIF26A            | G | A | 0,010 | 0,002 | 2,89E-08 | 0,016  | 0,014 | 0,259 |
| rs2180870   | 14 | Intron:ARID4A            | T | C | 0,012 | 0,002 | 1,12E-08 | 0,007  | 0,014 | 0,631 |
| rs28929474  | 14 | Nonsynonymous:SERPINA1   | C | T | 0,037 | 0,005 | 1,34E-11 | 0,147  | 0,045 | 0,001 |
| rs12907323  | 15 | Intron:AGBL1             | G | A | 0,009 | 0,002 | 9,93E-09 | 0,005  | 0,009 | 0,632 |
| rs2472297   | 15 | Intergenic               | T | C | 0,011 | 0,002 | 3,1E-10  | -0,003 | 0,013 | 0,818 |
| rs1104608   | 16 | Intergenic               | G | C | 0,011 | 0,002 | 1,05E-13 | -0,002 | 0,010 | 0,816 |
| rs113443718 | 16 | Intron:SEZ6L2            | G | A | 0,010 | 0,002 | 1,19E-10 | 0,003  | 0,012 | 0,793 |
| rs17177078  | 16 | Intron:TNRC6A            | C | T | 0,022 | 0,003 | 1,27E-13 | 0,016  | 0,021 | 0,453 |
| rs2764771   | 16 | Intergenic               | A | G | 0,010 | 0,002 | 4,02E-10 | -0,011 | 0,010 | 0,248 |
| rs378421    | 16 | Intergenic               | G | A | 0,011 | 0,002 | 4,83E-14 | -0,012 | 0,013 | 0,347 |

|            |    |                          |   |   |       |       |          |  |        |       |       |
|------------|----|--------------------------|---|---|-------|-------|----------|--|--------|-------|-------|
| rs62044525 | 16 | Intergenic               | C | G | 0,012 | 0,002 | 1,03E-10 |  | -0,011 | 0,013 | 0,386 |
| rs7185555  | 16 | Intergenic               | G | C | 0,011 | 0,002 | 4,24E-08 |  | 0,002  | 0,014 | 0,891 |
| rs79616692 | 16 | Intron:LINC01572         | C | G | 0,016 | 0,002 | 4,11E-12 |  | -0,031 | 0,016 | 0,055 |
| rs10438820 | 17 | Intron:RPTOR             | T | C | 0,009 | 0,002 | 1,76E-08 |  | -0,016 | 0,010 | 0,108 |
| rs2854334  | 17 | Intergenic               | G | A | 0,009 | 0,002 | 7,51E-10 |  | -0,010 | 0,010 | 0,298 |
| rs3803800  | 17 | Nonsynonymous:TNFSF12-13 | G | A | 0,011 | 0,002 | 1,5E-10  |  | -0,013 | 0,011 | 0,240 |
| rs4548913  | 17 | Intron:SRR               | G | A | 0,008 | 0,002 | 3,11E-08 |  | 0,037  | 0,010 | 0,000 |
| rs4092465  | 18 | Intergenic               | A | G | 0,008 | 0,002 | 4,39E-08 |  | 0,005  | 0,010 | 0,648 |
| rs9950000  | 18 | Intron:TCF4              | C | T | 0,009 | 0,002 | 9,38E-10 |  | -0,005 | 0,009 | 0,632 |
| rs281379   | 19 | Intergenic               | A | G | 0,014 | 0,002 | 4,91E-21 |  | 0,011  | 0,010 | 0,298 |
| rs4815364  | 20 | Intron:ACSS1             | A | G | 0,009 | 0,002 | 1,02E-08 |  | 0,012  | 0,010 | 0,233 |
| rs9607814  | 22 | Intergenic               | C | A | 0,010 | 0,002 | 4,31E-08 |  | 0,006  | 0,011 | 0,608 |

\*Data are from genome-wide association studies on alcohol consumption<sup>1</sup> and coronary artery disease.<sup>16</sup> † The betas for alcohol consumption are per SD increase of log-transformed drinks per week. The betas for coronary artery disease are log odds ratios.

**Table VI. Association between alcohol-related SNPs and atrial fibrillation in the Atrial Fibrillation Consortium\***

| SNP        | Chr | Gene                 | EA | NEA | Associations with alcohol |       |          | Association with atrial fibrillation |       |       |
|------------|-----|----------------------|----|-----|---------------------------|-------|----------|--------------------------------------|-------|-------|
|            |     |                      |    |     | Beta†                     | SE    | P        | Beta†                                | SE    | P     |
| rs10753661 | 1   | Intergenic           | G  | A   | 0,009                     | 0,002 | 3,76E-08 | 0,007                                | 0,008 | 0,368 |
| rs12088813 | 1   | Intron:PDE4B         | A  | C   | 0,009                     | 0,002 | 1,58E-08 | 0,007                                | 0,008 | 0,401 |
| rs28680958 | 1   | Intron:ZBTB37        | G  | A   | 0,011                     | 0,002 | 5,13E-10 | 0,006                                | 0,009 | 0,516 |
| rs5024204  | 1   | Intron:PTGER3        | T  | A   | 0,010                     | 0,002 | 2,55E-09 | 0,003                                | 0,008 | 0,753 |
| rs58107686 | 1   | Intron:PHC2          | C  | A   | 0,010                     | 0,002 | 7,79E-10 | 0,012                                | 0,008 | 0,123 |
| rs705687   | 1   | Intergenic           | A  | G   | 0,011                     | 0,002 | 8,15E-10 | 0,029                                | 0,009 | 0,001 |
| rs823114   | 1   | Intergenic           | A  | G   | 0,009                     | 0,002 | 2,31E-09 | -0,037                               | 0,007 | 0,000 |
| rs11692435 | 2   | Nonsynonymous:ACTR1B | A  | G   | 0,017                     | 0,003 | 2,53E-11 | 0,011                                | 0,014 | 0,401 |
| rs1260326  | 2   | Nonsynonymous:GCKR   | C  | T   | 0,021                     | 0,002 | 8,05E-45 | 0,007                                | 0,007 | 0,340 |
| rs13024996 | 2   | Intron:ARHGAP15      | C  | A   | 0,011                     | 0,002 | 5,72E-13 | -0,002                               | 0,008 | 0,828 |
| rs13032049 | 2   | Intron:WDPCP         | G  | A   | 0,010                     | 0,002 | 3E-10    | 0,008                                | 0,008 | 0,315 |
| rs13383034 | 2   | Intron:LINC01833     | T  | C   | 0,015                     | 0,002 | 6,31E-22 | 0,002                                | 0,008 | 0,772 |
| rs2178197  | 2   | Intron:GPN1          | A  | G   | 0,009                     | 0,002 | 2,45E-09 | -0,003                               | 0,007 | 0,705 |
| rs56337305 | 2   | Intergenic           | T  | C   | 0,010                     | 0,002 | 1,63E-10 | 0,003                                | 0,007 | 0,691 |
| rs72859280 | 2   | Intergenic           | T  | G   | 0,023                     | 0,004 | 4,44E-09 | 0,039                                | 0,021 | 0,067 |
| rs77165542 | 2   | Intergenic           | C  | T   | 0,026                     | 0,004 | 5,63E-11 | 0,050                                | 0,025 | 0,043 |
| rs828867   | 2   | Utr3:TET3            | A  | G   | 0,009                     | 0,002 | 2,15E-09 | 0,015                                | 0,007 | 0,035 |
| rs13066454 | 3   | Intergenic           | C  | T   | 0,009                     | 0,002 | 4,13E-09 | -0,007                               | 0,007 | 0,314 |
| rs13094887 | 3   | Intergenic           | A  | T   | 0,010                     | 0,002 | 8,57E-11 | -0,008                               | 0,008 | 0,308 |
| rs2011092  | 3   | Intron:ZBTB38        | T  | C   | 0,009                     | 0,002 | 7,35E-09 | -0,022                               | 0,008 | 0,006 |
| rs35894540 | 3   | Intron:CADM2         | T  | C   | 0,013                     | 0,002 | 1,58E-14 | 0,013                                | 0,007 | 0,087 |
| rs60654199 | 3   | Intron:RSA2          | C  | A   | 0,017                     | 0,003 | 2,85E-08 | -0,025                               | 0,013 | 0,063 |
| rs62250685 | 3   | Intron:CADM2         | A  | G   | 0,014                     | 0,002 | 1,05E-21 | 0,012                                | 0,007 | 0,096 |
| rs6787172  | 3   | Intron:RSRC1         | T  | G   | 0,008                     | 0,002 | 4,27E-08 | -0,006                               | 0,007 | 0,406 |
| rs9838144  | 3   | Intron:CPNE4         | G  | C   | 0,010                     | 0,002 | 2,65E-08 | -0,017                               | 0,009 | 0,068 |

|             |   |                       |   |   |       |       |           |  |        |       |       |
|-------------|---|-----------------------|---|---|-------|-------|-----------|--|--------|-------|-------|
| rs10004020  | 4 | Intergenic            | A | G | 0,009 | 0,002 | 2,43E-08  |  | -0,004 | 0,008 | 0,582 |
| rs10028756  | 4 | Intergenic            | G | A | 0,019 | 0,002 | 1,16E-17  |  | -0,008 | 0,011 | 0,486 |
| rs113909752 | 4 | Intron:ADH1C          | C | T | 0,039 | 0,004 | 6,56E-27  |  | 0,030  | 0,014 | 0,035 |
| rs11940694  | 4 | Intron:KLB            | G | A | 0,026 | 0,002 | 3,03E-68  |  | 0,014  | 0,007 | 0,049 |
| rs1229984   | 4 | Nonsynonymous:ADH1B   | C | T | 0,151 | 0,004 | <2,2e-308 |  | 0,023  | 0,019 | 0,216 |
| rs12499107  | 4 | Intergenic            | G | A | 0,013 | 0,002 | 4,45E-09  |  | 0,001  | 0,010 | 0,902 |
| rs12651313  | 4 | Intergenic            | C | G | 0,009 | 0,002 | 3,79E-09  |  | 0,012  | 0,007 | 0,101 |
| rs13107325  | 4 | Nonsynonymous:SLC39A8 | C | T | 0,028 | 0,003 | 1,53E-22  |  | 0,000  | 0,015 | 0,986 |
| rs17029090  | 4 | Synonymous:C4orf17    | A | G | 0,049 | 0,005 | 4,75E-21  |  | -0,005 | 0,020 | 0,806 |
| rs2165670   | 4 | Intergenic            | A | G | 0,023 | 0,002 | 1,67E-22  |  | 0,024  | 0,012 | 0,044 |
| rs36052336  | 4 | Intron:ADH1C          | A | G | 0,018 | 0,003 | 1,23E-09  |  | -0,002 | 0,016 | 0,905 |
| rs3748034   | 4 | Nonsynonymous:HGFAC   | G | T | 0,012 | 0,002 | 1,67E-08  |  | 0,013  | 0,010 | 0,210 |
| rs4501255   | 4 | Intron:BEND4          | G | C | 0,011 | 0,002 | 4,83E-10  |  | 0,000  | 0,009 | 0,962 |
| rs4690727   | 4 | Intron:INPP4B         | G | C | 0,011 | 0,002 | 2,43E-11  |  | 0,001  | 0,008 | 0,942 |
| rs4699791   | 4 | Intergenic            | A | G | 0,019 | 0,003 | 6,58E-14  |  | 0,009  | 0,012 | 0,440 |
| rs7682824   | 4 | Intergenic            | T | C | 0,008 | 0,002 | 2,77E-08  |  | 0,004  | 0,013 | 0,740 |
| rs79139602  | 4 | Intron:C4orf17        | T | A | 0,060 | 0,005 | 1,80E-32  |  | -0,019 | 0,018 | 0,272 |
| rs11739827  | 5 | Intron:TENM2          | G | T | 0,008 | 0,002 | 1,18E-08  |  | 0,000  | 0,007 | 0,969 |
| rs12655091  | 5 | Intergenic            | G | A | 0,008 | 0,002 | 1,25E-08  |  | -0,005 | 0,007 | 0,488 |
| rs4916723   | 5 | Intron:LINC00461      | A | C | 0,010 | 0,002 | 1,72E-11  |  | -0,003 | 0,007 | 0,663 |
| rs55872084  | 5 | Intron:SGCD           | T | G | 0,010 | 0,002 | 6,32E-09  |  | -0,008 | 0,009 | 0,369 |
| rs10085696  | 7 | Intron:AUTS2          | A | G | 0,011 | 0,002 | 1,12E-09  |  | 0,011  | 0,009 | 0,228 |
| rs10236149  | 7 | Intron:ARPC1B         | A | G | 0,014 | 0,002 | 1,18E-09  |  | -0,009 | 0,010 | 0,399 |
| rs35034355  | 7 | Intron:ORC5           | G | A | 0,008 | 0,002 | 2,87E-08  |  | -0,006 | 0,007 | 0,380 |
| rs6460047   | 7 | Intergenic            | C | T | 0,012 | 0,002 | 9,69E-11  |  | 0,015  | 0,009 | 0,098 |
| rs6951574   | 7 | Intergenic            | C | T | 0,013 | 0,002 | 1,58E-19  |  | -0,005 | 0,008 | 0,538 |
| rs1217091   | 8 | Intergenic            | C | T | 0,012 | 0,002 | 7,05E-11  |  | -0,011 | 0,009 | 0,251 |
| rs13250583  | 8 | Intergenic            | C | T | 0,010 | 0,002 | 4,70E-8   |  | 0,017  | 0,009 | 0,055 |

|             |    |                          |   |   |       |       |          |  |        |       |       |
|-------------|----|--------------------------|---|---|-------|-------|----------|--|--------|-------|-------|
| rs28601761  | 8  | Intergenic               | G | C | 0,009 | 0,002 | 7,17E-10 |  | -0,001 | 0,007 | 0,879 |
| rs10978550  | 9  | Intergenic               | T | C | 0,012 | 0,002 | 7,15E-11 |  | -0,001 | 0,009 | 0,887 |
| rs55932213  | 9  | Intergenic               | G | A | 0,010 | 0,002 | 9,55E-09 |  | 0,017  | 0,008 | 0,036 |
| rs17665139  | 10 | Intergenic               | C | T | 0,012 | 0,002 | 1,59E-08 |  | 0,003  | 0,010 | 0,786 |
| rs7074871   | 10 | Intergenic               | G | A | 0,009 | 0,002 | 1,86E-08 |  | 0,008  | 0,008 | 0,304 |
| rs10750025  | 11 | Intergenic               | T | C | 0,010 | 0,002 | 4,89E-11 |  | 0,000  | 0,008 | 0,955 |
| rs11030084  | 11 | Intron:BDNF-AS LINC00678 | C | T | 0,011 | 0,002 | 1,72E-08 |  | -0,001 | 0,009 | 0,909 |
| rs12795042  | 11 | Intron:LOC646522         | A | C | 0,008 | 0,002 | 3,25E-08 |  | -0,008 | 0,008 | 0,270 |
| rs1713676   | 11 | Intergenic               | A | G | 0,008 | 0,002 | 4,29E-08 |  | 0,013  | 0,007 | 0,065 |
| rs4938230   | 11 | Intergenic               | A | C | 0,013 | 0,002 | 1,48E-10 |  | 0,010  | 0,010 | 0,297 |
| rs56030824  | 11 | Intron:SPI1              | G | A | 0,012 | 0,002 | 1,15E-13 |  | -0,007 | 0,008 | 0,347 |
| rs682011    | 11 | Intergenic               | C | T | 0,008 | 0,002 | 2,22E-08 |  | 0,005  | 0,007 | 0,527 |
| rs7950166   | 11 | Intron:TRIM66            | C | T | 0,010 | 0,002 | 9,89E-11 |  | 0,001  | 0,007 | 0,934 |
| rs10506274  | 12 | Intron:ACSS3             | G | T | 0,009 | 0,002 | 5,78E-10 |  | 0,000  | 0,007 | 0,988 |
| rs10876188  | 12 | Intron:SLC4A8            | C | T | 0,008 | 0,002 | 4,84E-08 |  | 0,000  | 0,007 | 0,993 |
| rs3809162   | 12 | Intergenic               | G | A | 0,009 | 0,002 | 1,19E-09 |  | -0,014 | 0,007 | 0,051 |
| rs4842786   | 12 | Intergenic               | G | A | 0,009 | 0,002 | 2,73E-09 |  | 0,008  | 0,007 | 0,254 |
| rs500321    | 13 | Intergenic               | A | T | 0,010 | 0,002 | 4,92E-09 |  | -0,010 | 0,008 | 0,249 |
| rs1123285   | 14 | Intron:OTX2              | C | G | 0,009 | 0,002 | 8,14E-09 |  | -0,004 | 0,008 | 0,563 |
| rs11625650  | 14 | Intron:KIF26A            | G | A | 0,010 | 0,002 | 2,89E-08 |  | -0,005 | 0,009 | 0,584 |
| rs2180870   | 14 | Intron:ARID4A            | T | C | 0,012 | 0,002 | 1,12E-08 |  | 0,015  | 0,011 | 0,181 |
| rs28929474  | 14 | Nonsynonymous:SERPINA1   | C | T | 0,037 | 0,005 | 1,34E-11 |  | -0,001 | 0,031 | 0,973 |
| rs12907323  | 15 | Intron:AGBL1             | G | A | 0,009 | 0,002 | 9,93E-09 |  | 0,004  | 0,007 | 0,595 |
| rs2472297   | 15 | Intergenic               | T | C | 0,011 | 0,002 | 3,1E-10  |  | -0,002 | 0,009 | 0,865 |
| rs1104608   | 16 | Intergenic               | G | C | 0,011 | 0,002 | 1,05E-13 |  | -0,002 | 0,008 | 0,813 |
| rs113443718 | 16 | Intron:SEZ6L2            | G | A | 0,010 | 0,002 | 1,19E-10 |  | 0,005  | 0,008 | 0,502 |
| rs17177078  | 16 | Intron:TNRC6A            | C | T | 0,022 | 0,003 | 1,27E-13 |  | -0,010 | 0,016 | 0,548 |
| rs2764771   | 16 | Intergenic               | A | G | 0,010 | 0,002 | 4,02E-10 |  | -0,003 | 0,008 | 0,718 |

|            |    |                          |   |   |       |       |          |  |        |       |       |
|------------|----|--------------------------|---|---|-------|-------|----------|--|--------|-------|-------|
| rs378421   | 16 | Intergenic               | G | A | 0,011 | 0,002 | 4,83E-14 |  | 0,000  | 0,008 | 0,991 |
| rs62044525 | 16 | Intergenic               | C | G | 0,012 | 0,002 | 1,03E-10 |  | -0,004 | 0,010 | 0,717 |
| rs7185555  | 16 | Intergenic               | G | C | 0,011 | 0,002 | 4,24E-08 |  | 0,020  | 0,010 | 0,052 |
| rs79616692 | 16 | Intron:LINC01572         | C | G | 0,016 | 0,002 | 4,11E-12 |  | 0,006  | 0,012 | 0,641 |
| rs10438820 | 17 | Intron:RPTOR             | T | C | 0,009 | 0,002 | 1,76E-08 |  | -0,001 | 0,008 | 0,858 |
| rs2854334  | 17 | Intergenic               | G | A | 0,009 | 0,002 | 7,51E-10 |  | 0,012  | 0,007 | 0,116 |
| rs3803800  | 17 | Nonsynonymous:TNFSF12-13 | G | A | 0,011 | 0,002 | 1,5E-10  |  | -0,017 | 0,008 | 0,043 |
| rs4548913  | 17 | Intron:SRR               | G | A | 0,008 | 0,002 | 3,11E-08 |  | 0,017  | 0,008 | 0,024 |
| rs4092465  | 18 | Intergenic               | A | G | 0,008 | 0,002 | 4,39E-08 |  | 0,007  | 0,008 | 0,335 |
| rs9950000  | 18 | Intron:TCF4              | C | T | 0,009 | 0,002 | 9,38E-10 |  | -0,005 | 0,007 | 0,473 |
| rs281379   | 19 | Intergenic               | A | G | 0,014 | 0,002 | 4,91E-21 |  | -0,002 | 0,008 | 0,766 |
| rs4815364  | 20 | Intron:ACSS1             | A | G | 0,009 | 0,002 | 1,02E-08 |  | 0,010  | 0,008 | 0,183 |
| rs9607814  | 22 | Intergenic               | C | A | 0,010 | 0,002 | 4,31E-08 |  | -0,013 | 0,009 | 0,180 |

\*Data are from genome-wide association studies on alcohol consumption<sup>1</sup> and atrial fibrillation.<sup>7</sup> †The betas for alcohol consumption are per SD increase of log-transformed drinks per week. The betas for atrial fibrillation are log odds ratios.

**Table VII. Associations between alcohol-related SNPs and cardiovascular diseases in UK Biobank\***

| SNP        | Chr | Gene                 | EA | NEA | Alcohol consumption |       |          | Stroke |       |       | Coronary artery disease |       |       | Heart failure |       |       |
|------------|-----|----------------------|----|-----|---------------------|-------|----------|--------|-------|-------|-------------------------|-------|-------|---------------|-------|-------|
|            |     |                      |    |     | Beta†               | SE    | P        | Beta†  | SE    | P     | Beta†                   | SE    | P     | Beta†         | SE    | P     |
| rs10753661 | 1   | Intergenic           | G  | A   | 0,009               | 0,002 | 3,76E-08 | -0,007 | 0,016 | 0,672 | -0,004                  | 0,010 | 0,709 | 0,017         | 0,019 | 0,360 |
| rs12088813 | 1   | Intron:PDE4B         | A  | C   | 0,009               | 0,002 | 1,58E-08 | 0,024  | 0,017 | 0,147 | 0,014                   | 0,010 | 0,156 | 0,020         | 0,020 | 0,317 |
| rs28680958 | 1   | Intron:ZBTB37        | G  | A   | 0,011               | 0,002 | 5,13E-10 | -0,005 | 0,018 | 0,786 | 0,006                   | 0,011 | 0,612 | 0,030         | 0,022 | 0,167 |
| rs5024204  | 1   | Intron:PTGER3        | T  | A   | 0,010               | 0,002 | 2,55E-09 | -0,006 | 0,017 | 0,708 | 0,008                   | 0,010 | 0,404 | 0,021         | 0,020 | 0,298 |
| rs58107686 | 1   | Intron:PHC2          | C  | A   | 0,010               | 0,002 | 7,79E-10 | 0,004  | 0,016 | 0,793 | 0,006                   | 0,010 | 0,532 | -0,006        | 0,019 | 0,738 |
| rs705687   | 1   | Intergenic           | A  | G   | 0,011               | 0,002 | 8,15E-10 | 0,006  | 0,018 | 0,724 | -0,002                  | 0,011 | 0,889 | -0,020        | 0,021 | 0,357 |
| rs823114   | 1   | Intergenic           | A  | G   | 0,009               | 0,002 | 2,31E-09 | 0,006  | 0,015 | 0,686 | -0,002                  | 0,009 | 0,822 | 0,025         | 0,018 | 0,157 |
| rs11692435 | 2   | Nonsynonymous:ACTR1B | A  | G   | 0,017               | 0,003 | 2,53E-11 | -0,016 | 0,028 | 0,567 | 0,039                   | 0,017 | 0,019 | 0,015         | 0,033 | 0,657 |
| rs1260326  | 2   | Nonsynonymous:GCKR   | C  | T   | 0,021               | 0,002 | 8,05E-45 | 0,000  | 0,015 | 0,985 | -0,028                  | 0,009 | 0,002 | -0,016        | 0,018 | 0,370 |
| rs13024996 | 2   | Intron:ARHGAP15      | C  | A   | 0,011               | 0,002 | 5,72E-13 | 0,027  | 0,015 | 0,076 | -0,007                  | 0,009 | 0,433 | 0,035         | 0,018 | 0,057 |
| rs13032049 | 2   | Intron:WDPCP         | G  | A   | 0,010               | 0,002 | 3E-10    | -0,005 | 0,016 | 0,767 | -0,031                  | 0,010 | 0,002 | -0,019        | 0,020 | 0,330 |
| rs13383034 | 2   | Intron:LINC01833     | T  | C   | 0,015               | 0,002 | 6,31E-22 | 0,019  | 0,016 | 0,230 | 0,007                   | 0,010 | 0,483 | 0,029         | 0,019 | 0,127 |
| rs2178197  | 2   | Intron:GPN1          | A  | G   | 0,009               | 0,002 | 2,45E-09 | -0,015 | 0,015 | 0,319 | 0,002                   | 0,009 | 0,806 | 0,003         | 0,018 | 0,883 |
| rs56337305 | 2   | Intergenic           | T  | C   | 0,010               | 0,002 | 1,63E-10 | 0,003  | 0,015 | 0,856 | 0,004                   | 0,009 | 0,634 | -0,038        | 0,018 | 0,038 |
| rs72859280 | 2   | Intergenic           | T  | G   | 0,023               | 0,004 | 4,44E-09 | 0,010  | 0,039 | 0,809 | 0,053                   | 0,023 | 0,025 | 0,045         | 0,046 | 0,335 |
| rs77165542 | 2   | Intergenic           | C  | T   | 0,026               | 0,004 | 5,63E-11 | -0,005 | 0,040 | 0,900 | 0,066                   | 0,025 | 0,008 | 0,129         | 0,051 | 0,010 |
| rs828867   | 2   | Utr3:TET3            | A  | G   | 0,009               | 0,002 | 2,15E-09 | -0,003 | 0,015 | 0,849 | 0,019                   | 0,009 | 0,040 | 0,012         | 0,018 | 0,504 |
| rs13066454 | 3   | Intergenic           | C  | T   | 0,009               | 0,002 | 4,13E-09 | -0,008 | 0,015 | 0,613 | 0,016                   | 0,009 | 0,082 | 0,033         | 0,018 | 0,071 |
| rs13094887 | 3   | Intergenic           | A  | T   | 0,010               | 0,002 | 8,57E-11 | -0,013 | 0,016 | 0,411 | -0,012                  | 0,010 | 0,214 | -0,019        | 0,019 | 0,318 |
| rs2011092  | 3   | Intron:ZBTB38        | T  | C   | 0,009               | 0,002 | 7,35E-09 | -0,020 | 0,015 | 0,206 | 0,010                   | 0,009 | 0,291 | -0,043        | 0,018 | 0,020 |
| rs60654199 | 3   | Intron:RASA2         | C  | A   | 0,017               | 0,003 | 2,85E-08 | 0,022  | 0,030 | 0,455 | -0,012                  | 0,018 | 0,484 | 0,005         | 0,035 | 0,890 |
| rs62250685 | 3   | Intron:CADM2         | A  | G   | 0,014               | 0,002 | 1,05E-21 | 0,019  | 0,015 | 0,201 | 0,010                   | 0,009 | 0,286 | 0,004         | 0,018 | 0,809 |
| rs6787172  | 3   | Intron:RSRC1         | T  | G   | 0,008               | 0,002 | 4,27E-08 | 0,002  | 0,015 | 0,899 | -0,012                  | 0,009 | 0,179 | -0,021        | 0,018 | 0,230 |

|             |   |                       |   |   |       |       |           |  |        |       |       |  |        |       |       |  |        |       |       |
|-------------|---|-----------------------|---|---|-------|-------|-----------|--|--------|-------|-------|--|--------|-------|-------|--|--------|-------|-------|
| rs74664784  | 3 | Intron:CADM2          | T | C | 0,013 | 0,002 | 1,58E-14  |  | -0,203 | 0,360 | 0,585 |  | 0,206  | 0,257 | 0,410 |  | -0,125 | 0,444 | 0,783 |
| rs9838144   | 3 | Intron:CPNE4          | G | C | 0,010 | 0,002 | 2,65E-08  |  | 0,005  | 0,018 | 0,765 |  | 0,011  | 0,011 | 0,332 |  | 0,002  | 0,022 | 0,937 |
| rs10004020  | 4 | Intergenic            | A | G | 0,009 | 0,002 | 2,43E-08  |  | -0,029 | 0,016 | 0,072 |  | 0,002  | 0,010 | 0,845 |  | -0,002 | 0,020 | 0,927 |
| rs10028756  | 4 | Intergenic            | G | A | 0,019 | 0,002 | 1,16E-17  |  | -0,012 | 0,022 | 0,587 |  | -0,011 | 0,013 | 0,407 |  | -0,063 | 0,025 | 0,014 |
| rs11940694  | 4 | Intron:KLB            | G | A | 0,026 | 0,002 | 3,03E-68  |  | 0,001  | 0,015 | 0,951 |  | 0,006  | 0,009 | 0,496 |  | 0,018  | 0,018 | 0,321 |
| rs1229984   | 4 | Nonsynonymous:ADH1B   | C | T | 0,151 | 0,004 | <2,2e-308 |  | 0,020  | 0,048 | 0,684 |  | 0,124  | 0,030 | 0,000 |  | 0,081  | 0,059 | 0,163 |
| rs12499107  | 4 | Intergenic            | G | A | 0,013 | 0,002 | 4,45E-09  |  | 0,015  | 0,022 | 0,484 |  | -0,011 | 0,013 | 0,417 |  | -0,002 | 0,026 | 0,947 |
| rs12651313  | 4 | Intergenic            | C | G | 0,009 | 0,002 | 3,79E-09  |  | 0,011  | 0,015 | 0,461 |  | 0,006  | 0,009 | 0,486 |  | -0,011 | 0,018 | 0,532 |
| rs13107325  | 4 | Nonsynonymous:SLC39A8 | C | T | 0,028 | 0,003 | 1,53E-22  |  | 0,021  | 0,028 | 0,455 |  | -0,005 | 0,017 | 0,788 |  | -0,078 | 0,032 | 0,017 |
| rs17029090  | 4 | Synonymous:C4orf17    | A | G | 0,049 | 0,005 | 4,75E-21  |  | -0,051 | 0,052 | 0,332 |  | 0,014  | 0,032 | 0,666 |  | 0,074  | 0,066 | 0,257 |
| rs2165670   | 4 | Intergenic            | A | G | 0,023 | 0,002 | 1,67E-22  |  | 0,034  | 0,024 | 0,161 |  | 0,037  | 0,015 | 0,012 |  | 0,020  | 0,029 | 0,491 |
| rs36052336  | 4 | Intron:ADH1C          | A | G | 0,018 | 0,003 | 1,23E-09  |  | 0,012  | 0,030 | 0,681 |  | -0,008 | 0,018 | 0,673 |  | -0,033 | 0,036 | 0,363 |
| rs3748034   | 4 | Nonsynonymous:HGFAC   | G | T | 0,012 | 0,002 | 1,67E-08  |  | 0,009  | 0,021 | 0,683 |  | -0,036 | 0,013 | 0,004 |  | -0,009 | 0,025 | 0,737 |
| rs4501255   | 4 | Intron:BEND4          | G | C | 0,011 | 0,002 | 4,83E-10  |  | 0,016  | 0,017 | 0,339 |  | 0,008  | 0,010 | 0,419 |  | 0,001  | 0,021 | 0,948 |
| rs4690727   | 4 | Intron:INPP4B         | G | C | 0,011 | 0,002 | 2,43E-11  |  | 0,003  | 0,017 | 0,881 |  | -0,010 | 0,010 | 0,312 |  | -0,023 | 0,020 | 0,248 |
| rs4699791   | 4 | Intergenic            | A | G | 0,019 | 0,003 | 6,58E-14  |  | -0,026 | 0,025 | 0,301 |  | 0,003  | 0,015 | 0,832 |  | -0,041 | 0,030 | 0,169 |
| rs561222871 | 4 | Intron:ADH1C          | C | T | 0,039 | 0,004 | 6,56E-27  |  | 0,387  | 0,604 | 0,503 |  | 0,301  | 0,348 | 0,374 |  | 0,384  | 0,727 | 0,581 |
| rs7682824   | 4 | Intergenic            | T | C | 0,008 | 0,002 | 2,77E-08  |  | -,0300 | 0,021 | 0,152 |  | 0,008  | 0,013 | 0,514 |  | -0,016 | 0,025 | 0,514 |
| rs79139602  | 4 | Intron:C4orf17        | T | A | 0,060 | 0,005 | 1,80E-32  |  | 0,031  | 0,051 | 0,553 |  | -0,019 | 0,032 | 0,545 |  | -0,086 | 0,065 | 0,180 |
| rs11739827  | 5 | Intron:TENM2          | G | T | 0,008 | 0,002 | 1,18E-08  |  | -0,013 | 0,015 | 0,386 |  | -0,001 | 0,009 | 0,940 |  | 0,004  | 0,018 | 0,845 |
| rs12655091  | 5 | Intergenic            | G | A | 0,008 | 0,002 | 1,25E-08  |  | -0,011 | 0,015 | 0,458 |  | -0,019 | 0,009 | 0,031 |  | -0,009 | 0,018 | 0,621 |
| rs4916723   | 5 | Intron:LINC00461      | A | C | 0,010 | 0,002 | 1,72E-11  |  | -0,012 | 0,015 | 0,443 |  | 0,006  | 0,009 | 0,529 |  | 0,012  | 0,018 | 0,506 |
| rs55872084  | 5 | Intron:SGCD           | T | G | 0,010 | 0,002 | 6,32E-09  |  | -0,021 | 0,017 | 0,230 |  | -0,004 | 0,010 | 0,739 |  | -0,025 | 0,021 | 0,217 |
| rs10085696  | 7 | Intron:AUTS2          | A | G | 0,011 | 0,002 | 1,12E-09  |  | 0,003  | 0,019 | 0,889 |  | 0,013  | 0,012 | 0,268 |  | 0,049  | 0,023 | 0,033 |
| rs10236149  | 7 | Intron:ARPC1B         | A | G | 0,014 | 0,002 | 1,18E-09  |  | 0,009  | 0,022 | 0,703 |  | 0,025  | 0,014 | 0,070 |  | 0,039  | 0,027 | 0,146 |
| rs35034355  | 7 | Intron:ORC5           | G | A | 0,008 | 0,002 | 2,87E-08  |  | 0,004  | 0,015 | 0,802 |  | -0,017 | 0,009 | 0,052 |  | -0,020 | 0,018 | 0,256 |
| rs6460047   | 7 | Intergenic            | C | T | 0,012 | 0,002 | 9,69E-11  |  | 0,031  | 0,018 | 0,083 |  | -0,002 | 0,011 | 0,830 |  | -0,007 | 0,022 | 0,756 |



|            |    |                        |   |   |       |       |          |  |        |       |       |  |        |       |       |        |       |       |
|------------|----|------------------------|---|---|-------|-------|----------|--|--------|-------|-------|--|--------|-------|-------|--------|-------|-------|
| rs6951574  | 7  | Intergenic             | C | T | 0,013 | 0,002 | 1,58E-19 |  | 0,014  | 0,015 | 0,350 |  | 0,014  | 0,009 | 0,118 | -0,002 | 0,018 | 0,934 |
| rs1217091  | 8  | Intergenic             | C | T | 0,012 | 0,002 | 7,05E-11 |  | 0,039  | 0,019 | 0,040 |  | 0,001  | 0,011 | 0,935 | -0,022 | 0,022 | 0,317 |
| rs13250583 | 8  | Intergenic             | C | T | 0,010 | 0,002 | 4,70E-08 |  | -0,001 | 0,018 | 0,960 |  | 0,009  | 0,011 | 0,400 | -0,007 | 0,022 | 0,739 |
| rs28601761 | 8  | Intergenic             | G | C | 0,009 | 0,002 | 7,17E-10 |  | -0,015 | 0,015 | 0,334 |  | -0,058 | 0,009 | 0,000 | -0,058 | 0,018 | 0,001 |
| rs10978550 | 9  | Intergenic             | T | C | 0,012 | 0,002 | 7,15E-11 |  | 0,001  | 0,018 | 0,953 |  | -0,011 | 0,011 | 0,313 | 0,046  | 0,022 | 0,036 |
| rs55932213 | 9  | Intergenic             | G | A | 0,010 | 0,002 | 9,55E-09 |  | 0,004  | 0,017 | 0,828 |  | -0,004 | 0,010 | 0,708 | -0,030 | 0,021 | 0,150 |
| rs17665139 | 10 | Intergenic             | C | T | 0,012 | 0,002 | 1,59E-08 |  | -0,027 | 0,020 | 0,183 |  | -0,010 | 0,012 | 0,404 | -0,027 | 0,024 | 0,270 |
| rs7074871  | 10 | Intergenic             | G | A | 0,009 | 0,002 | 1,86E-08 |  | 0,004  | 0,017 | 0,794 |  | 0,000  | 0,010 | 0,990 | -0,002 | 0,020 | 0,908 |
| rs10750025 | 11 | Intergenic             | T | C | 0,010 | 0,002 | 4,89E-11 |  | 0,026  | 0,016 | 0,108 |  | 0,011  | 0,010 | 0,244 | 0,015  | 0,019 | 0,429 |
| rs11030084 | 11 | Intron:BDNF            | C | T | 0,011 | 0,002 | 1,72E-08 |  | 0,026  | 0,019 | 0,169 |  | 0,007  | 0,012 | 0,532 | -0,001 | 0,023 | 0,965 |
| rs12795042 | 11 | Intron:LOC646522       | A | C | 0,008 | 0,002 | 3,25E-08 |  | -0,026 | 0,015 | 0,091 |  | -0,015 | 0,009 | 0,103 | -0,014 | 0,018 | 0,455 |
| rs1713676  | 11 | Intergenic             | A | G | 0,008 | 0,002 | 4,29E-08 |  | 0,011  | 0,015 | 0,476 |  | 0,026  | 0,009 | 0,003 | 0,018  | 0,018 | 0,312 |
| rs4938230  | 11 | Intergenic             | A | C | 0,013 | 0,002 | 1,48E-10 |  | 0,021  | 0,021 | 0,304 |  | -0,015 | 0,012 | 0,216 | 0,024  | 0,025 | 0,335 |
| rs56030824 | 11 | Intron:SPI1            | G | A | 0,012 | 0,002 | 1,15E-13 |  | 0,008  | 0,016 | 0,617 |  | 0,007  | 0,010 | 0,436 | -0,002 | 0,019 | 0,936 |
| rs682011   | 11 | Intergenic             | C | T | 0,008 | 0,002 | 2,22E-08 |  | 0,019  | 0,015 | 0,189 |  | -0,001 | 0,009 | 0,878 | -0,008 | 0,018 | 0,653 |
| rs7950166  | 11 | Intron:TRIM66          | C | T | 0,010 | 0,002 | 9,89E-11 |  | 0,019  | 0,015 | 0,213 |  | -0,016 | 0,009 | 0,089 | -0,011 | 0,018 | 0,566 |
| rs10506274 | 12 | Intron:ACSS3           | G | T | 0,009 | 0,002 | 5,78E-10 |  | 0,003  | 0,015 | 0,838 |  | 0,025  | 0,009 | 0,005 | 0,023  | 0,018 | 0,199 |
| rs10876188 | 12 | Intron:SLC4A8          | C | T | 0,008 | 0,002 | 4,84E-08 |  | 0,009  | 0,015 | 0,532 |  | 0,014  | 0,009 | 0,110 | 0,001  | 0,018 | 0,968 |
| rs3809162  | 12 | Intergenic             | G | A | 0,009 | 0,002 | 1,19E-09 |  | -0,004 | 0,015 | 0,804 |  | -0,017 | 0,009 | 0,065 | 0,011  | 0,018 | 0,524 |
| rs4842786  | 12 | Intergenic             | G | A | 0,009 | 0,002 | 2,73E-09 |  | 0,013  | 0,015 | 0,399 |  | -0,010 | 0,009 | 0,275 | 0,003  | 0,018 | 0,878 |
| rs500321   | 13 | Intergenic             | A | T | 0,010 | 0,002 | 4,92E-09 |  | 0,030  | 0,016 | 0,066 |  | 0,001  | 0,010 | 0,917 | -0,011 | 0,020 | 0,576 |
| rs1123285  | 14 | Intron:OTX2            | C | G | 0,009 | 0,002 | 8,14E-09 |  | -0,017 | 0,016 | 0,286 |  | 0,004  | 0,010 | 0,715 | 0,007  | 0,019 | 0,705 |
| rs11625650 | 14 | Intron:KIF26A          | G | A | 0,010 | 0,002 | 2,89E-08 |  | -0,012 | 0,017 | 0,493 |  | 0,026  | 0,011 | 0,012 | 0,009  | 0,021 | 0,679 |
| rs2180870  | 14 | Intron:ARID4A          | T | C | 0,012 | 0,002 | 1,12E-08 |  | 0,033  | 0,022 | 0,129 |  | -0,026 | 0,013 | 0,048 | -0,040 | 0,026 | 0,120 |
| rs28929474 | 14 | Nonsynonymous:SERPINA1 | C | T | 0,037 | 0,005 | 1,34E-11 |  | -0,004 | 0,052 | 0,942 |  | 0,098  | 0,033 | 0,003 | 0,017  | 0,063 | 0,783 |
| rs12907323 | 15 | Intron:AGBL1           | G | A | 0,009 | 0,002 | 9,93E-09 |  | 0,003  | 0,015 | 0,823 |  | 0,003  | 0,009 | 0,758 | 0,013  | 0,018 | 0,483 |
| rs2472297  | 15 | Intergenic             | T | C | 0,011 | 0,002 | 3,1E-10  |  | 0,001  | 0,017 | 0,942 |  | -0,018 | 0,010 | 0,083 | -0,004 | 0,020 | 0,840 |

|             |    |                       |   |   |       |       |          |  |        |       |       |  |        |       |       |  |        |       |       |
|-------------|----|-----------------------|---|---|-------|-------|----------|--|--------|-------|-------|--|--------|-------|-------|--|--------|-------|-------|
| rs1104608   | 16 | Intergenic            | G | C | 0,011 | 0,002 | 1,05E-13 |  | 0,007  | 0,015 | 0,632 |  | 0,009  | 0,009 | 0,309 |  | -0,010 | 0,018 | 0,564 |
| rs113443718 | 16 | Intron:SEZ6L2         | G | A | 0,010 | 0,002 | 1,19E-10 |  | -0,015 | 0,016 | 0,361 |  | -0,018 | 0,010 | 0,068 |  | -0,013 | 0,019 | 0,483 |
| rs17177078  | 16 | Intron:TNRC6A         | C | T | 0,022 | 0,003 | 1,27E-13 |  | -0,038 | 0,032 | 0,236 |  | -0,027 | 0,019 | 0,162 |  | -0,034 | 0,038 | 0,367 |
| rs2764771   | 16 | Intergenic            | A | G | 0,010 | 0,002 | 4,02E-10 |  | -0,008 | 0,016 | 0,636 |  | -0,032 | 0,010 | 0,001 |  | -0,048 | 0,019 | 0,013 |
| rs378421    | 16 | Intergenic            | G | A | 0,011 | 0,002 | 4,83E-14 |  | 0,001  | 0,015 | 0,924 |  | 0,005  | 0,009 | 0,564 |  | -0,024 | 0,018 | 0,174 |
| rs62044525  | 16 | Intergenic            | C | G | 0,012 | 0,002 | 1,03E-10 |  | -0,012 | 0,019 | 0,530 |  | -0,008 | 0,011 | 0,509 |  | 0,024  | 0,023 | 0,283 |
| rs7185555   | 16 | Intergenic            | G | C | 0,011 | 0,002 | 4,24E-08 |  | -0,001 | 0,020 | 0,970 |  | 0,033  | 0,012 | 0,007 |  | 0,027  | 0,024 | 0,273 |
| rs79616692  | 16 | Intron:LINC01572      | C | G | 0,016 | 0,002 | 4,11E-12 |  | 0,017  | 0,024 | 0,465 |  | -0,007 | 0,015 | 0,616 |  | -0,034 | 0,029 | 0,239 |
| rs10438820  | 17 | Intron:RPTOR          | T | C | 0,009 | 0,002 | 1,76E-08 |  | -0,008 | 0,016 | 0,607 |  | -0,009 | 0,010 | 0,381 |  | 0,036  | 0,019 | 0,064 |
| rs2854334   | 17 | Intergenic            | G | A | 0,009 | 0,002 | 7,51E-10 |  | 0,004  | 0,015 | 0,798 |  | -0,002 | 0,009 | 0,871 |  | -0,023 | 0,018 | 0,212 |
| rs3803800   | 17 | Nonsynonymous:TNFSF12 | G | A | 0,011 | 0,002 | 1,5E-10  |  | 0,032  | 0,018 | 0,081 |  | 0,003  | 0,011 | 0,815 |  | 0,000  | 0,022 | 0,991 |
| rs4548913   | 17 | Intron:SRR            | G | A | 0,008 | 0,002 | 3,11E-08 |  | 0,046  | 0,015 | 0,003 |  | 0,041  | 0,009 | 0,000 |  | 0,030  | 0,018 | 0,100 |
| rs4092465   | 18 | Intergenic            | A | G | 0,008 | 0,002 | 4,39E-08 |  | 0,001  | 0,016 | 0,970 |  | -0,010 | 0,009 | 0,270 |  | -0,019 | 0,019 | 0,295 |
| rs9950000   | 18 | Intron:TCF4           | C | T | 0,009 | 0,002 | 9,38E-10 |  | -0,005 | 0,015 | 0,739 |  | -0,009 | 0,009 | 0,352 |  | -0,002 | 0,018 | 0,914 |
| rs281379    | 19 | Intergenic            | A | G | 0,014 | 0,002 | 4,91E-21 |  | 0,037  | 0,015 | 0,011 |  | 0,022  | 0,009 | 0,016 |  | 0,018  | 0,018 | 0,316 |
| rs4815364   | 20 | Intron:ACSS1          | A | G | 0,009 | 0,002 | 1,02E-08 |  | -0,006 | 0,015 | 0,691 |  | 0,005  | 0,009 | 0,568 |  | 0,032  | 0,018 | 0,079 |
| rs9607814   | 22 | Intergenic            | C | A | 0,010 | 0,002 | 4,31E-08 |  | -0,019 | 0,019 | 0,309 |  | 0,001  | 0,011 | 0,932 |  | -0,016 | 0,022 | 0,471 |

\*Data are from genome-wide association studies on alcohol consumption<sup>1</sup> and from UK Biobank. †The betas for alcohol consumption are per SD increase of log-transformed drinks per week and the betas for the cardiovascular diseases are log odds ratios.

**Table VII continued. Association between alcohol-related SNPs and cardiovascular diseases in UK Biobank\***

| SNP        | Chr | Gene                     | EA | NE<br>A | Alcohol consumption |       |          | Venous<br>thromboembolism |       |       | Peripheral artery<br>disease |       |       | Aortic valve stenosis |       |       | Abdominal aortic<br>aneurysm |       |       |
|------------|-----|--------------------------|----|---------|---------------------|-------|----------|---------------------------|-------|-------|------------------------------|-------|-------|-----------------------|-------|-------|------------------------------|-------|-------|
|            |     |                          |    |         | Beta†               | SE    | P        | Beta†                     | SE    | P     | Beta†                        | SE    | P     | Beta†                 | SE    | P     | Beta†                        | SE    | P     |
| rs10753661 | 1   | Intergenic               | G  | A       | 0,009               | 0,002 | 3,76E-08 | 0,005                     | 0,013 | 0,705 | 0,024                        | 0,026 | 0,359 | -0,014                | 0,033 | 0,669 | -0,020                       | 0,047 | 0,669 |
| rs12088813 | 1   | Intron:PDE4B             | A  | C       | 0,009               | 0,002 | 1,58E-08 | 0,029                     | 0,014 | 0,034 | 0,005                        | 0,027 | 0,844 | -0,007                | 0,034 | 0,847 | 0,039                        | 0,049 | 0,419 |
| rs28680958 | 1   | Intron:ZBTB37            | G  | A       | 0,011               | 0,002 | 5,13E-10 | -0,025                    | 0,015 | 0,096 | 0,023                        | 0,030 | 0,432 | -0,046                | 0,036 | 0,199 | 0,047                        | 0,053 | 0,369 |
| rs5024204  | 1   | Intron:PTGER3            | T  | A       | 0,010               | 0,002 | 2,55E-09 | 0,002                     | 0,014 | 0,894 | 0,006                        | 0,028 | 0,824 | 0,052                 | 0,034 | 0,126 | -0,048                       | 0,049 | 0,332 |
| rs58107686 | 1   | Intron:PHC2              | C  | A       | 0,010               | 0,002 | 7,79E-10 | 0,006                     | 0,013 | 0,623 | 0,018                        | 0,026 | 0,484 | -0,038                | 0,032 | 0,232 | 0,032                        | 0,046 | 0,490 |
| rs705687   | 1   | Intergenic               | A  | G       | 0,011               | 0,002 | 8,15E-10 | 0,020                     | 0,015 | 0,162 | -0,008                       | 0,029 | 0,781 | 0,023                 | 0,036 | 0,518 | 0,034                        | 0,051 | 0,503 |
| rs823114   | 1   | Intergenic               | A  | G       | 0,009               | 0,002 | 2,31E-09 | -0,024                    | 0,012 | 0,050 | 0,018                        | 0,025 | 0,469 | -0,018                | 0,030 | 0,561 | -0,029                       | 0,043 | 0,506 |
| rs11692435 | 2   | Nonsynonymous:ACTR1<br>B | A  | G       | 0,017               | 0,003 | 2,53E-11 | -0,019                    | 0,023 | 0,406 | 0,129                        | 0,044 | 0,004 | 0,006                 | 0,057 | 0,914 | 0,219                        | 0,075 | 0,005 |
| rs1260326  | 2   | Nonsynonymous:GCKR       | C  | T       | 0,021               | 0,002 | 8,05E-45 | 0,021                     | 0,013 | 0,101 | -0,021                       | 0,025 | 0,398 | -0,081                | 0,031 | 0,008 | 0,056                        | 0,044 | 0,208 |
| rs13024996 | 2   | Intron:ARHGAP15          | C  | A       | 0,011               | 0,002 | 5,72E-13 | 0,030                     | 0,013 | 0,018 | 0,053                        | 0,026 | 0,037 | 0,016                 | 0,031 | 0,617 | 0,054                        | 0,045 | 0,227 |
| rs13032049 | 2   | Intron:WDPCP             | G  | A       | 0,010               | 0,002 | 3,00E-10 | 0,004                     | 0,014 | 0,752 | -0,017                       | 0,027 | 0,541 | -0,019                | 0,034 | 0,581 | -0,039                       | 0,049 | 0,425 |
| rs13383034 | 2   | Intron:LINC01833         | T  | C       | 0,015               | 0,002 | 6,31E-22 | 0,023                     | 0,013 | 0,084 | 0,059                        | 0,026 | 0,024 | -0,008                | 0,033 | 0,799 | -0,007                       | 0,047 | 0,876 |
| rs2178197  | 2   | Intron:GPN1              | A  | G       | 0,009               | 0,002 | 2,45E-09 | 0,013                     | 0,012 | 0,307 | 0,029                        | 0,025 | 0,248 | 0,069                 | 0,030 | 0,022 | -0,039                       | 0,044 | 0,375 |
| rs56337305 | 2   | Intergenic               | T  | C       | 0,010               | 0,002 | 1,63E-10 | 0,003                     | 0,013 | 0,799 | 0,006                        | 0,025 | 0,805 | 0,023                 | 0,031 | 0,469 | -0,008                       | 0,045 | 0,860 |
| rs72859280 | 2   | Intergenic               | T  | G       | 0,023               | 0,004 | 4,44E-09 | 0,062                     | 0,032 | 0,053 | 0,162                        | 0,061 | 0,009 | 0,003                 | 0,080 | 0,969 | -0,018                       | 0,117 | 0,878 |
| rs77165542 | 2   | Intergenic               | C  | T       | 0,026               | 0,004 | 5,63E-11 | 0,099                     | 0,035 | 0,004 | 0,181                        | 0,072 | 0,010 | 0,077                 | 0,085 | 0,362 | 0,109                        | 0,123 | 0,368 |
| rs828867   | 2   | Utr3:TET3                | A  | G       | 0,009               | 0,002 | 2,15E-09 | 0,008                     | 0,013 | 0,546 | 0,014                        | 0,025 | 0,568 | 0,036                 | 0,031 | 0,246 | -0,021                       | 0,044 | 0,626 |
| rs13066454 | 3   | Intergenic               | C  | T       | 0,009               | 0,002 | 4,13E-09 | -0,031                    | 0,012 | 0,013 | 0,022                        | 0,025 | 0,388 | 0,009                 | 0,031 | 0,760 | 0,032                        | 0,044 | 0,470 |
| rs13094887 | 3   | Intergenic               | A  | T       | 0,010               | 0,002 | 8,57E-11 | 0,005                     | 0,013 | 0,689 | -0,005                       | 0,027 | 0,839 | -0,020                | 0,033 | 0,553 | 0,036                        | 0,047 | 0,449 |
| rs2011092  | 3   | Intron:ZBTB38            | T  | C       | 0,009               | 0,002 | 7,35E-09 | 0,010                     | 0,013 | 0,425 | 0,007                        | 0,026 | 0,795 | -0,047                | 0,031 | 0,139 | -0,016                       | 0,045 | 0,730 |
| rs60654199 | 3   | Intron:RASA2             | C  | A       | 0,017               | 0,003 | 2,85E-08 | -0,040                    | 0,024 | 0,100 | 0,023                        | 0,049 | 0,638 | -0,042                | 0,059 | 0,481 | 0,021                        | 0,087 | 0,808 |
| rs62250685 | 3   | Intron:CADM2             | A  | G       | 0,014               | 0,002 | 1,05E-21 | 0,013                     | 0,013 | 0,309 | 0,018                        | 0,025 | 0,463 | 0,017                 | 0,031 | 0,572 | -0,117                       | 0,045 | 0,009 |
| rs6787172  | 3   | Intron:RSRC1             | T  | G       | 0,008               | 0,002 | 4,27E-08 | -0,004                    | 0,012 | 0,770 | -0,003                       | 0,025 | 0,916 | 0,034                 | 0,030 | 0,258 | 0,027                        | 0,043 | 0,536 |

|             |   |                       |   |   |       |       |          |        |       |       |        |       |       |        |       |       |        |       |       |
|-------------|---|-----------------------|---|---|-------|-------|----------|--------|-------|-------|--------|-------|-------|--------|-------|-------|--------|-------|-------|
| rs74664784  | 3 | Intron:CADM2          | T | C | 0,013 | 0,002 | 1,58E-14 | 0,195  | 0,352 | 0,568 | 0,303  | 0,771 | 0,680 | -0,360 | 0,677 | 0,615 | -0,186 | 1,076 | 0,867 |
| rs9838144   | 3 | Intron:CPNE4          | G | C | 0,010 | 0,002 | 2,65E-08 | -0,018 | 0,015 | 0,226 | -0,020 | 0,030 | 0,502 | 0,048  | 0,038 | 0,197 | -0,027 | 0,053 | 0,613 |
| rs10004020  | 4 | Intergenic            | A | G | 0,009 | 0,002 | 2,43E-08 | 0,016  | 0,014 | 0,237 | -0,007 | 0,027 | 0,799 | -0,086 | 0,033 | 0,009 | 0,061  | 0,049 | 0,210 |
| rs10028756  | 4 | Intergenic            | G | A | 0,019 | 0,002 | 1,16E-17 | 0,042  | 0,018 | 0,020 | 0,004  | 0,036 | 0,916 | 0,085  | 0,046 | 0,060 | 0,178  | 0,068 | 0,007 |
| rs11940694  | 4 | Intron:KLB            | G | A | 0,026 | 0,002 | 3,03E-68 | -0,010 | 0,013 | 0,420 | 0,022  | 0,025 | 0,381 | 0,002  | 0,031 | 0,946 | -0,023 | 0,044 | 0,602 |
| rs1229984   | 4 | Nonsynonymous:ADH1B   | C | T | 0,151 | 0,004 | <2E-308  | -0,016 | 0,039 | 0,673 | 0,240  | 0,089 | 0,005 | 0,181  | 0,105 | 0,077 | 0,371  | 0,165 | 0,017 |
| rs12499107  | 4 | Intergenic            | G | A | 0,013 | 0,002 | 4,45E-09 | 0,007  | 0,018 | 0,691 | -0,025 | 0,036 | 0,487 | 0,000  | 0,044 | 0,996 | 0,035  | 0,063 | 0,578 |
| rs12651313  | 4 | Intergenic            | C | G | 0,009 | 0,002 | 3,79E-09 | 0,012  | 0,012 | 0,346 | 0,002  | 0,025 | 0,936 | 0,023  | 0,030 | 0,442 | -0,039 | 0,043 | 0,370 |
| rs13107325  | 4 | Nonsynonymous:SLC39A8 | C | T | 0,028 | 0,003 | 1,53E-22 | -0,067 | 0,023 | 0,003 | 0,001  | 0,046 | 0,982 | 0,053  | 0,058 | 0,358 | 0,147  | 0,086 | 0,083 |
| rs17029090  | 4 | Synonymous:C4orf17    | A | G | 0,049 | 0,005 | 4,75E-21 | -0,029 | 0,044 | 0,505 | 0,029  | 0,090 | 0,743 | -0,157 | 0,101 | 0,129 | -0,124 | 0,145 | 0,404 |
| rs2165670   | 4 | Intergenic            | A | G | 0,023 | 0,002 | 1,67E-22 | 0,025  | 0,020 | 0,207 | 0,070  | 0,039 | 0,079 | 0,094  | 0,048 | 0,053 | 0,003  | 0,072 | 0,972 |
| rs36052336  | 4 | Intron:ADH1C          | A | G | 0,018 | 0,003 | 1,23E-09 | -0,017 | 0,025 | 0,510 | -0,011 | 0,050 | 0,828 | -0,079 | 0,060 | 0,190 | -0,030 | 0,088 | 0,736 |
| rs3748034   | 4 | Nonsynonymous:HGFA C  | G | T | 0,012 | 0,002 | 1,67E-08 | 0,016  | 0,018 | 0,377 | -0,044 | 0,035 | 0,208 | -0,018 | 0,043 | 0,681 | -0,101 | 0,060 | 0,093 |
| rs4501255   | 4 | Intron:BEND4          | G | C | 0,011 | 0,002 | 4,83E-10 | -0,014 | 0,014 | 0,339 | 0,056  | 0,028 | 0,047 | 0,015  | 0,035 | 0,680 | -0,020 | 0,051 | 0,695 |
| rs4690727   | 4 | Intron:INPP4B         | G | C | 0,011 | 0,002 | 2,43E-11 | -0,011 | 0,014 | 0,424 | -0,016 | 0,027 | 0,552 | -0,015 | 0,034 | 0,647 | 0,005  | 0,048 | 0,924 |
| rs4699791   | 4 | Intergenic            | A | G | 0,019 | 0,003 | 6,58E-14 | -0,006 | 0,021 | 0,786 | 0,034  | 0,041 | 0,399 | 0,025  | 0,050 | 0,624 | 0,008  | 0,073 | 0,910 |
| rs561222871 | 4 | Intron:ADH1C          | C | T | 0,039 | 0,004 | 6,56E-27 | -0,065 | 0,422 | 0,878 | 0,572  | 1,080 | 0,572 | -0,890 | 0,797 | 0,314 | -0,421 | 1,404 | 0,776 |
| rs7682824   | 4 | Intergenic            | T | C | 0,008 | 0,002 | 2,77E-08 | -0,014 | 0,017 | 0,409 | -0,022 | 0,035 | 0,523 | -0,016 | 0,043 | 0,705 | 0,101  | 0,060 | 0,094 |
| rs79139602  | 4 | Intron:C4orf17        | T | A | 0,060 | 0,005 | 1,80E-32 | 0,018  | 0,043 | 0,677 | -0,044 | 0,089 | 0,619 | 0,147  | 0,100 | 0,150 | 0,099  | 0,145 | 0,500 |
| rs11739827  | 5 | Intron:TENM2          | G | T | 0,008 | 0,002 | 1,18E-08 | 0,000  | 0,012 | 0,987 | 0,007  | 0,025 | 0,793 | -0,026 | 0,031 | 0,395 | 0,018  | 0,044 | 0,683 |
| rs12655091  | 5 | Intergenic            | G | A | 0,008 | 0,002 | 1,25E-08 | -0,009 | 0,012 | 0,460 | -0,002 | 0,025 | 0,945 | 0,026  | 0,030 | 0,394 | -0,068 | 0,043 | 0,116 |
| rs4916723   | 5 | Intron:LINC00461      | A | C | 0,010 | 0,002 | 1,72E-11 | 0,004  | 0,013 | 0,724 | 0,006  | 0,025 | 0,800 | -0,042 | 0,031 | 0,176 | 0,034  | 0,044 | 0,447 |
| rs55872084  | 5 | Intron:SGCD           | T | G | 0,010 | 0,002 | 6,32E-09 | -0,013 | 0,014 | 0,373 | -0,026 | 0,029 | 0,368 | -0,014 | 0,035 | 0,684 | -0,017 | 0,050 | 0,738 |
| rs10085696  | 7 | Intron:AUTS2          | A | G | 0,011 | 0,002 | 1,12E-09 | -0,026 | 0,016 | 0,098 | 0,048  | 0,032 | 0,133 | -0,007 | 0,039 | 0,867 | 0,026  | 0,056 | 0,645 |
| rs10236149  | 7 | Intron:ARPC1B         | A | G | 0,014 | 0,002 | 1,18E-09 | -0,010 | 0,018 | 0,582 | 0,006  | 0,037 | 0,870 | 0,027  | 0,046 | 0,550 | 0,144  | 0,069 | 0,032 |
| rs35034355  | 7 | Intron:ORC5           | G | A | 0,008 | 0,002 | 2,87E-08 | 0,001  | 0,012 | 0,930 | 0,008  | 0,024 | 0,729 | -0,010 | 0,030 | 0,730 | -0,019 | 0,043 | 0,663 |
| rs6460047   | 7 | Intergenic            | C | T | 0,012 | 0,002 | 9,69E-11 | -0,001 | 0,015 | 0,939 | 0,031  | 0,030 | 0,298 | 0,039  | 0,037 | 0,295 | -0,059 | 0,054 | 0,271 |

|            |    |                          |   |   |       |       |          |        |       |       |        |       |       |        |       |       |        |       |       |
|------------|----|--------------------------|---|---|-------|-------|----------|--------|-------|-------|--------|-------|-------|--------|-------|-------|--------|-------|-------|
| rs6951574  | 7  | Intergenic               | C | T | 0,013 | 0,002 | 1,58E-19 | -0,012 | 0,012 | 0,336 | -0,004 | 0,025 | 0,863 | -0,012 | 0,030 | 0,690 | 0,046  | 0,044 | 0,287 |
| rs1217091  | 8  | Intergenic               | C | T | 0,012 | 0,002 | 7,05E-11 | 0,022  | 0,016 | 0,159 | 0,080  | 0,032 | 0,012 | 0,033  | 0,039 | 0,390 | 0,068  | 0,056 | 0,221 |
| rs13250583 | 8  | Intergenic               | C | T | 0,010 | 0,002 | 4,70E-08 | 0,003  | 0,015 | 0,831 | -0,030 | 0,030 | 0,313 | 0,018  | 0,037 | 0,620 | 0,008  | 0,053 | 0,882 |
| rs28601761 | 8  | Intergenic               | G | C | 0,009 | 0,002 | 7,17E-10 | 0,020  | 0,013 | 0,106 | -0,006 | 0,025 | 0,817 | -0,066 | 0,031 | 0,033 | -0,101 | 0,045 | 0,023 |
| rs10978550 | 9  | Intergenic               | T | C | 0,012 | 0,002 | 7,15E-11 | 0,009  | 0,015 | 0,554 | 0,021  | 0,031 | 0,490 | 0,039  | 0,038 | 0,306 | 0,037  | 0,054 | 0,493 |
| rs55932213 | 9  | Intergenic               | G | A | 0,010 | 0,002 | 9,55E-09 | -0,002 | 0,014 | 0,867 | -0,063 | 0,028 | 0,026 | 0,001  | 0,035 | 0,988 | 0,083  | 0,052 | 0,104 |
| rs17665139 | 10 | Intergenic               | C | T | 0,012 | 0,002 | 1,59E-08 | -0,013 | 0,017 | 0,452 | 0,006  | 0,034 | 0,869 | -0,012 | 0,042 | 0,781 | 0,036  | 0,061 | 0,557 |
| rs7074871  | 10 | Intergenic               | G | A | 0,009 | 0,002 | 1,86E-08 | -0,005 | 0,014 | 0,743 | 0,019  | 0,028 | 0,491 | 0,032  | 0,035 | 0,354 | -0,058 | 0,049 | 0,231 |
| rs10750025 | 11 | Intergenic               | T | C | 0,010 | 0,002 | 4,89E-11 | -0,005 | 0,013 | 0,699 | 0,014  | 0,026 | 0,599 | -0,015 | 0,032 | 0,652 | 0,051  | 0,047 | 0,271 |
| rs11030084 | 11 | Intron:BDNF-AS LINC00678 | C | T | 0,011 | 0,002 | 1,72E-08 | -0,009 | 0,016 | 0,567 | 0,044  | 0,032 | 0,165 | 0,037  | 0,039 | 0,339 | 0,032  | 0,056 | 0,570 |
| rs12795042 | 11 | Intron:LOC646522         | A | C | 0,008 | 0,002 | 3,25E-08 | -0,018 | 0,013 | 0,165 | -0,019 | 0,026 | 0,468 | 0,018  | 0,031 | 0,558 | 0,031  | 0,045 | 0,485 |
| rs1713676  | 11 | Intergenic               | A | G | 0,008 | 0,002 | 4,29E-08 | -0,007 | 0,012 | 0,568 | 0,013  | 0,024 | 0,602 | 0,035  | 0,030 | 0,250 | 0,021  | 0,043 | 0,628 |
| rs4938230  | 11 | Intergenic               | A | C | 0,013 | 0,002 | 1,48E-10 | 0,029  | 0,017 | 0,090 | 0,017  | 0,034 | 0,612 | -0,037 | 0,042 | 0,379 | 0,061  | 0,062 | 0,318 |
| rs56030824 | 11 | Intron:SPI1              | G | A | 0,012 | 0,002 | 1,15E-13 | 0,016  | 0,013 | 0,214 | 0,016  | 0,026 | 0,532 | 0,008  | 0,032 | 0,804 | 0,058  | 0,047 | 0,210 |
| rs682011   | 11 | Intergenic               | C | T | 0,008 | 0,002 | 2,22E-08 | -0,002 | 0,012 | 0,874 | 0,008  | 0,025 | 0,736 | -0,012 | 0,030 | 0,688 | -0,013 | 0,043 | 0,759 |
| rs7950166  | 11 | Intron:TRIM66            | C | T | 0,010 | 0,002 | 9,89E-11 | -0,010 | 0,013 | 0,456 | 0,024  | 0,025 | 0,337 | -0,078 | 0,032 | 0,013 | -0,034 | 0,045 | 0,451 |
| rs10506274 | 12 | Intron:ACSS3             | G | T | 0,009 | 0,002 | 5,78E-10 | 0,018  | 0,012 | 0,133 | 0,046  | 0,024 | 0,059 | -0,037 | 0,030 | 0,220 | -0,072 | 0,043 | 0,094 |
| rs10876188 | 12 | Intron:SLC4A8            | C | T | 0,008 | 0,002 | 4,84E-08 | -0,014 | 0,012 | 0,249 | -0,009 | 0,025 | 0,702 | 0,026  | 0,030 | 0,396 | -0,006 | 0,043 | 0,894 |
| rs3809162  | 12 | Intergenic               | G | A | 0,009 | 0,002 | 1,19E-09 | -0,014 | 0,012 | 0,263 | 0,017  | 0,025 | 0,496 | -0,052 | 0,031 | 0,093 | -0,034 | 0,044 | 0,445 |
| rs4842786  | 12 | Intergenic               | G | A | 0,009 | 0,002 | 2,73E-09 | -0,007 | 0,012 | 0,564 | -0,019 | 0,025 | 0,453 | -0,018 | 0,031 | 0,552 | -0,011 | 0,044 | 0,800 |
| rs500321   | 13 | Intergenic               | A | T | 0,010 | 0,002 | 4,92E-09 | -0,012 | 0,014 | 0,366 | -0,007 | 0,028 | 0,800 | -0,004 | 0,034 | 0,907 | -0,025 | 0,049 | 0,602 |
| rs1123285  | 14 | Intron:OTX2              | C | G | 0,009 | 0,002 | 8,14E-09 | 0,003  | 0,013 | 0,834 | -0,003 | 0,026 | 0,902 | -0,040 | 0,032 | 0,213 | 0,058  | 0,047 | 0,212 |
| rs11625650 | 14 | Intron:KIF26A            | G | A | 0,010 | 0,002 | 2,89E-08 | -0,014 | 0,014 | 0,334 | 0,042  | 0,029 | 0,145 | 0,006  | 0,035 | 0,875 | -0,022 | 0,050 | 0,656 |
| rs2180870  | 14 | Intron:ARID4A            | T | C | 0,012 | 0,002 | 1,12E-08 | 0,029  | 0,018 | 0,116 | 0,030  | 0,037 | 0,410 | -0,059 | 0,044 | 0,183 | 0,017  | 0,064 | 0,796 |
| rs28929474 | 14 | Nonsynonymous:SERPINA1   | C | T | 0,037 | 0,005 | 1,34E-11 | -0,172 | 0,040 | 0,000 | 0,151  | 0,094 | 0,100 | 0,185  | 0,116 | 0,103 | -0,189 | 0,139 | 0,186 |
| rs12907323 | 15 | Intron:AGBL1             | G | A | 0,009 | 0,002 | 9,93E-09 | -0,007 | 0,013 | 0,555 | 0,013  | 0,025 | 0,593 | -0,020 | 0,031 | 0,521 | 0,031  | 0,044 | 0,475 |
| rs2472297  | 15 | Intergenic               | T | C | 0,011 | 0,002 | 3,1E-10  | 0,003  | 0,014 | 0,834 | 0,026  | 0,028 | 0,340 | 0,015  | 0,034 | 0,657 | 0,019  | 0,049 | 0,704 |

|             |    |                                       |   |   |       |       |          |        |       |       |        |       |       |        |       |       |        |       |       |
|-------------|----|---------------------------------------|---|---|-------|-------|----------|--------|-------|-------|--------|-------|-------|--------|-------|-------|--------|-------|-------|
| rs1104608   | 16 | Intergenic                            | G | C | 0,011 | 0,002 | 1,05E-13 | 0,004  | 0,012 | 0,768 | 0,058  | 0,025 | 0,021 | 0,005  | 0,031 | 0,874 | -0,012 | 0,044 | 0,785 |
| rs113443718 | 16 | Intron:SEZ6L2                         | G | A | 0,010 | 0,002 | 1,19E-10 | -0,010 | 0,013 | 0,449 | -0,007 | 0,026 | 0,788 | -0,043 | 0,032 | 0,181 | 0,028  | 0,047 | 0,548 |
| rs17177078  | 16 | Intron:TNRC6A                         | C | T | 0,022 | 0,003 | 1,27E-13 | -0,015 | 0,026 | 0,564 | 0,130  | 0,057 | 0,019 | -0,002 | 0,066 | 0,974 | 0,066  | 0,097 | 0,490 |
| rs2764771   | 16 | Intergenic                            | A | G | 0,010 | 0,002 | 4,02E-10 | -0,008 | 0,013 | 0,552 | -0,080 | 0,027 | 0,003 | -0,037 | 0,033 | 0,257 | -0,036 | 0,047 | 0,448 |
| rs378421    | 16 | Intergenic                            | G | A | 0,011 | 0,002 | 4,83E-14 | -0,003 | 0,012 | 0,792 | -0,002 | 0,025 | 0,952 | -0,001 | 0,031 | 0,982 | -0,046 | 0,044 | 0,289 |
| rs62044525  | 16 | Intergenic                            | C | G | 0,012 | 0,002 | 1,03E-10 | 0,007  | 0,016 | 0,661 | 0,018  | 0,031 | 0,571 | 0,078  | 0,039 | 0,047 | -0,020 | 0,055 | 0,712 |
| rs7185555   | 16 | Intergenic                            | G | C | 0,011 | 0,002 | 4,24E-08 | -0,003 | 0,017 | 0,879 | -0,016 | 0,033 | 0,622 | 0,015  | 0,041 | 0,716 | -0,004 | 0,059 | 0,940 |
| rs79616692  | 16 | Intron:LINC01572                      | C | G | 0,016 | 0,002 | 4,11E-12 | -0,010 | 0,020 | 0,614 | -0,003 | 0,040 | 0,933 | 0,001  | 0,049 | 0,980 | 0,005  | 0,070 | 0,943 |
| rs10438820  | 17 | Intron:RPTOR                          | T | C | 0,009 | 0,002 | 1,76E-08 | 0,007  | 0,013 | 0,616 | -0,012 | 0,027 | 0,658 | 0,024  | 0,033 | 0,465 | 0,021  | 0,047 | 0,655 |
| rs2854334   | 17 | Intergenic                            | G | A | 0,009 | 0,002 | 7,51E-10 | -0,008 | 0,013 | 0,538 | -0,001 | 0,025 | 0,979 | -0,031 | 0,031 | 0,311 | 0,028  | 0,045 | 0,524 |
| rs3803800   | 17 | Nonsynonymous:TNFSF12-TNFSF13 TNFSF13 | G | A | 0,011 | 0,002 | 1,5E-10  | 0,009  | 0,015 | 0,566 | -0,013 | 0,030 | 0,675 | -0,070 | 0,036 | 0,054 | 0,044  | 0,053 | 0,413 |
| rs4548913   | 17 | Intron:SRR                            | G | A | 0,008 | 0,002 | 3,11E-08 | 0,014  | 0,013 | 0,271 | 0,023  | 0,025 | 0,374 | -0,036 | 0,032 | 0,256 | 0,057  | 0,045 | 0,201 |
| rs4092465   | 18 | Intergenic                            | A | G | 0,008 | 0,002 | 4,39E-08 | -0,015 | 0,013 | 0,256 | 0,013  | 0,026 | 0,624 | -0,070 | 0,032 | 0,029 | 0,014  | 0,045 | 0,760 |
| rs9950000   | 18 | Intron:TCF4                           | C | T | 0,009 | 0,002 | 9,38E-10 | -0,026 | 0,013 | 0,042 | -0,008 | 0,025 | 0,753 | 0,012  | 0,031 | 0,707 | 0,004  | 0,044 | 0,930 |
| rs281379    | 19 | Intergenic                            | A | G | 0,014 | 0,002 | 4,91E-21 | 0,053  | 0,012 | 0,000 | 0,038  | 0,025 | 0,124 | 0,032  | 0,030 | 0,291 | 0,032  | 0,043 | 0,467 |
| rs4815364   | 20 | Intron:ACSS1                          | A | G | 0,009 | 0,002 | 1,02E-08 | 0,033  | 0,013 | 0,008 | 0,009  | 0,025 | 0,724 | 0,010  | 0,031 | 0,749 | 0,008  | 0,044 | 0,851 |
| rs9607814   | 22 | Intergenic                            | C | A | 0,010 | 0,002 | 4,31E-08 | -0,013 | 0,015 | 0,392 | 0,020  | 0,031 | 0,513 | -0,032 | 0,038 | 0,400 | 0,051  | 0,056 | 0,358 |

\*Data are from genome-wide association studies on alcohol consumption<sup>1</sup> and from UK Biobank. †The betas for alcohol consumption are per SD increase of log-transformed drinks per week and the betas for the cardiovascular diseases are log odds ratios.

**Table VIII. Associations of alcohol consumption instrumented by 94 SNPs with blood pressure and serum lipids in UK Biobank**

| Outcome                  | Unit       | Method                  | Beta    | LB     | UB     | P value | SNPs | Egger, P value | No. of outliers |
|--------------------------|------------|-------------------------|---------|--------|--------|---------|------|----------------|-----------------|
| Systolic blood pressure  | mm Hg      | Univariable IVW         | 0.124   | 0.051  | 0.198  | 0.001   | 94   |                |                 |
| Systolic blood pressure  | mm Hg      | Weighted median         | 0.171   | 0.095  | 0.248  | <0.001  | 94   |                |                 |
| Systolic blood pressure  | mm Hg      | MR-Egger                | 0.259   | 0.122  | 0.395  | <0.001  | 94   | 0.024          |                 |
| Systolic blood pressure  | mm Hg      | MR-PRESSO               | 0.072   | 0.003  | 0.140  | 0.043   | 94   |                | 10              |
| Systolic blood pressure  | mm Hg      | MVMR (smoking-adjusted) | 0.150   | 0.066  | 0.234  | <0.001  | 94   |                |                 |
| Diastolic blood pressure | mm Hg      | Univariable IVW         | 0.152   | 0.053  | 0.249  | 0.003   | 94   |                |                 |
| Diastolic blood pressure | mm Hg      | Weighted median         | 0.141   | 0.057  | 0.224  | 0.001   | 94   |                |                 |
| Diastolic blood pressure | mm Hg      | MR-Egger                | 0.220   | 0.032  | 0.408  | 0.022   | 94   | 0.401          |                 |
| Diastolic blood pressure | mm Hg      | MR-PRESSO               | 0.123   | 0.045  | 0.201  | 0.003   | 94   |                | 11              |
| Diastolic blood pressure | mm Hg      | MVMR (smoking-adjusted) | 0.131   | 0.018  | 0.244  | 0.023   | 94   |                |                 |
| HDL cholesterol          | mmol/L     | Univariable IVW         | 0.386   | 0.246  | 0.525  | <0.001  | 94   |                |                 |
| HDL cholesterol          | mmol/L     | Weighted median         | 0.220   | 0.129  | 0.312  | <0.001  | 94   |                |                 |
| HDL cholesterol          | mmol/L     | MR-Egger                | 0.079   | -0.179 | 0.337  | 0.547   | 94   | 0.006          |                 |
| HDL cholesterol          | mmol/L     | MR-PRESSO               | 0.372   | 0.301  | 0.444  | <0.001  | 94   |                | 14              |
| HDL cholesterol          | mmol/L     | MVMR (smoking-adjusted) | 0.351   | 0.191  | 0.511  | <0.001  | 94   |                |                 |
| LDL cholesterol          | mmol/L     | Univariable IVW         | -0.011  | -0.018 | 0.159  | 0.900   | 94   |                |                 |
| LDL cholesterol          | mmol/L     | Weighted median         | 0.030   | -0.057 | 0.116  | 0.500   | 94   |                |                 |
| LDL cholesterol          | mmol/L     | MR-Egger                | 0.275   | -0.045 | 0.595  | 0.092   | 94   | 0.040          |                 |
| LDL cholesterol          | mmol/L     | MR-PRESSO               | -0.046  | -0.114 | 0.023  | 0.195   | 94   |                | 10              |
| LDL cholesterol          | mmol/L     | MVMR (smoking-adjusted) | 0.033   | -0.160 | 0.226  | 0.740   | 94   |                |                 |
| Triglycerides            | log-mmol/L | Univariable IVW         | -0.371  | -0.067 | -0.069 | 0.016   | 94   |                |                 |
| Triglycerides            | log-mmol/L | Weighted median         | -0.088  | -0.179 | 0.004  | 0.060   | 94   |                |                 |
| Triglycerides            | log-mmol/L | MR-Egger                | -0.303  | -0.886 | 0.280  | 0.309   | 94   | 0.787          |                 |
| Triglycerides            | log-mmol/L | MR-PRESSO               | -0.0212 | -0.292 | -0.133 | <0.001  | 94   |                | 21              |
| Triglycerides            | log-mmol/L | MVMR (smoking-adjusted) | -0.456  | -0.807 | -0.104 | 0.011   | 94   |                |                 |

\*IVW, inverse-variance weighted; LB, lower bound of the 95% confidence interval for the beta; MR-PRESSO, Mendelian randomization Pleiotropy RESidual Sum and Outlier; MVMR, multivariable Mendelian randomization; UB, upper bound of the 95% confidence interval of the beta.

**Table IX. Associations of alcohol consumption instrumented by rs1229984 in *ADH1B* with blood pressure and serum lipids in UK Biobank**

| <b>Outcome</b>           | <b>Unit</b> | <b>Beta</b> | <b>LB</b> | <b>UB</b> | <b>P Value</b> |
|--------------------------|-------------|-------------|-----------|-----------|----------------|
| Systolic blood pressure  | mmHg        | 0.305       | 0.231     | 0.378     | 3.61e-16       |
| Diastolic blood pressure | mmHg        | 0.125       | 0.030     | 0.221     | 0.010          |
| HDL cholesterol          | mmol/L      | 0.000       | -0.094    | 0.095     | 0.992          |
| LDL cholesterol          | mmol/L      | 0.397       | 0.298     | 0.495     | 4.01e-15       |
| Triglycerides            | log-mmol/L  | -0.084      | -0.180    | 0.013     | 0.089          |

\*LB, lower bound of the 95% confidence interval for the beta; UB, upper bound of the 95% confidence interval of the beta.



**Table X. Associations of alcohol consumption instrumented by up to 94 SNPs with cardiovascular disease using data from consortia and UK Biobank**

| Outcome                   | Data source                    | Method                  | OR    | LB    | UB    | P value | SNPs   | Egger, P value | No. of outliers |
|---------------------------|--------------------------------|-------------------------|-------|-------|-------|---------|--------|----------------|-----------------|
| Stroke                    | MEGASTROKE/UK Biobank          | Univariable IVW         | 1.270 | 1.116 | 1.445 | 2.87e-4 | 92/94* |                |                 |
| Stroke                    | MEGASTROKE/UK Biobank          | Weighted median         | 1.298 | 1.070 | 1.575 | 0.008   | 92/94* |                |                 |
| Stroke                    | MEGASTROKE/UK Biobank          | MR-Egger                | 1.205 | 0.974 | 1.490 | 0.085   | 92/94* | 0.56/0.90*     |                 |
| Stroke                    | MEGASTROKE/UK Biobank          | MR-PRESSO               | 1.270 | 1.116 | 1.445 | 2.87e-4 | 92/94* |                | 0/0*            |
| Stroke                    | MEGASTROKE/UK Biobank          | MVMR (smoking-adjusted) | 1.210 | 1.046 | 1.400 | 0.010   | 92/94* |                |                 |
| Coronary artery disease   | CARDIoGRAMplusC4D/UK Biobank   | Univariable IVW         | 1.164 | 0.998 | 1.358 | 0.052   | 93/94* |                |                 |
| Coronary artery disease   | CARDIoGRAMplusC4D/UK Biobank   | Weighted median         | 1.309 | 1.091 | 1.571 | 0.004   | 93/94* |                |                 |
| Coronary artery disease   | CARDIoGRAMplusC4D/UK Biobank   | MR-Egger                | 1.470 | 1.146 | 1.885 | 0.002   | 93/94* | 0.11/0.05*     |                 |
| Coronary artery disease   | CARDIoGRAMplusC4D/UK Biobank   | MR-PRESSO               | 1.162 | 1.019 | 1.326 | 0.026   | 93/94* |                | 3/5*            |
| Coronary artery disease   | CARDIoGRAMplusC4D/UK Biobank   | MVMR (smoking-adjusted) | 1.077 | 0.910 | 1.275 | 0.389   | 93/94* |                |                 |
| Atrial fibrillation       | Atrial Fibrillation Consortium | Univariable IVW         | 1.170 | 1.000 | 1.369 | 0.050   | 94     |                |                 |
| Atrial fibrillation       | Atrial Fibrillation Consortium | Weighted median         | 1.166 | 0.929 | 1.463 | 0.186   | 94     |                |                 |
| Atrial fibrillation       | Atrial Fibrillation Consortium | MR-Egger                | 1.238 | 0.944 | 1.624 | 0.124   | 94     | 0.62           |                 |
| Atrial fibrillation       | Atrial Fibrillation Consortium | MR-PRESSO               | 1.202 | 1.043 | 1.385 | 0.013   | 94     |                | 1               |
| Atrial fibrillation       | Atrial Fibrillation Consortium | MVMR (smoking-adjusted) | 1.112 | 0.933 | 1.323 | 0.237   | 94     |                |                 |
| Heart failure             | UK Biobank                     | Univariable IVW         | 1.001 | 0.682 | 1.469 | 0.996   | 94     |                |                 |
| Heart failure             | UK Biobank                     | Weighted median         | 1.605 | 0.902 | 2.858 | 0.108   | 94     |                |                 |
| Heart failure             | UK Biobank                     | MR-Egger                | 1.347 | 0.636 | 2.851 | 0.436   | 94     | 0.37           |                 |
| Heart failure             | UK Biobank                     | MR-PRESSO               | 1.001 | 0.682 | 1.469 | 0.996   | 94     |                | 0               |
| Heart failure             | UK Biobank                     | MVMR (smoking-adjusted) | 0.880 | 0.566 | 1.368 | 0.570   | 94     |                |                 |
| Venous thromboembolism    | UK Biobank                     | Univariable IVW         | 1.036 | 0.774 | 1.387 | 0.810   | 94     |                |                 |
| Venous thromboembolism    | UK Biobank                     | Weighted median         | 0.897 | 0.585 | 1.375 | 0.619   | 94     |                |                 |
| Venous thromboembolism    | UK Biobank                     | MR-Egger                | 0.958 | 0.547 | 1.676 | 0.879   | 94     | 0.75           |                 |
| Venous thromboembolism    | UK Biobank                     | MR-PRESSO               | 1.026 | 0.790 | 1.332 | 0.849   | 94     |                | 2               |
| Venous thromboembolism    | UK Biobank                     | MVMR (smoking-adjusted) | 1.048 | 0.748 | 1.468 | 0.784   | 94     |                |                 |
| Peripheral artery disease | UK Biobank                     | Univariable IVW         | 3.051 | 1.921 | 4.846 | 2.30e-6 | 94     |                |                 |

|                           |            |                         |       |       |       |         |    |      |   |
|---------------------------|------------|-------------------------|-------|-------|-------|---------|----|------|---|
| Peripheral artery disease | UK Biobank | Weighted median         | 3.796 | 1.777 | 8.110 | 0.001   | 94 |      |   |
| Peripheral artery disease | UK Biobank | MR-Egger                | 5.434 | 2.137 | 13.81 | 3.80e-4 | 94 | 0.16 |   |
| Peripheral artery disease | UK Biobank | MR-PRESSO               | 3.051 | 1.921 | 4.846 | 2.30e-6 | 94 |      | 0 |
| Peripheral artery disease | UK Biobank | MVMR (smoking-adjusted) | 2.550 | 1.493 | 4.354 | 6.09e-4 | 94 |      |   |
| Aortic valve stenosis     | UK Biobank | Univariable IVW         | 1.029 | 0.558 | 1.898 | 0.926   | 94 |      |   |
| Aortic valve stenosis     | UK Biobank | Weighted median         | 2.744 | 1.096 | 6.873 | 0.031   | 94 |      |   |
| Aortic valve stenosis     | UK Biobank | MR-Egger                | 3.347 | 1.021 | 10.96 | 0.046   | 94 | 0.02 |   |
| Aortic valve stenosis     | UK Biobank | MR-PRESSO               | 1.029 | 0.558 | 1.898 | 0.926   | 94 |      | 0 |
| Aortic valve stenosis     | UK Biobank | MVMR (smoking-adjusted) | 0.939 | 0.462 | 1.910 | 0.862   | 94 |      |   |
| Abdominal aortic aneurysm | UK Biobank | Univariable IVW         | 2.602 | 1.150 | 5.891 | 0.022   | 94 |      |   |
| Abdominal aortic aneurysm | UK Biobank | Weighted median         | 9.281 | 2.423 | 35.56 | 0.001   | 94 |      |   |
| Abdominal aortic aneurysm | UK Biobank | MR-Egger                | 7.890 | 1.477 | 42.13 | 0.016   | 94 | 0.14 |   |
| Abdominal aortic aneurysm | UK Biobank | MR-PRESSO               | 2.602 | 1.150 | 5.891 | 0.022   | 94 |      | 0 |
| Abdominal aortic aneurysm | UK Biobank | MVMR (smoking-adjusted) | 2.293 | 0.886 | 5.930 | 0.087   | 94 |      |   |

\*Consortium/UK Biobank. The consortium is MEGASTROKE for stroke and CARDIoGRAMplusC4D for coronary artery disease. CI, confidence interval; IVW, inverse-variance weighted; LB, lower bound of the 95% CI; MR-PRESSO, Mendelian randomization Pleiotropy RESidual Sum and Outlier; MVMR, multivariable Mendelian randomization; OR, odds ratio; UB, upper bound of the 95% CI.

**Table XI. Associations of alcohol consumption instrumented by 94 SNPs with cardiovascular diseases in 197 822 never smokers in UK Biobank\***

| <b>Outcome</b>            | <b>Cases</b> | <b>OR</b> | <b>95% CI</b> | <b>P Value</b> |
|---------------------------|--------------|-----------|---------------|----------------|
| Stroke                    | 3980         | 1.26      | 0.83-1.92     | 0.282          |
| Coronary artery disease   | 11 221       | 1.39      | 0.98-1.96     | 0.064          |
| Atrial fibrillation       | 7379         | 1.21      | 0.84-1.75     | 0.301          |
| Heart failure             | 2422         | 1.13      | 0.62-2.03     | 0.692          |
| Venous thromboembolism    | 6760         | 1.10      | 0.74-1.63     | 0.652          |
| Peripheral artery disease | 854          | 1.75      | 0.72-4.29     | 0.220          |
| Aortic valve stenosis     | 847          | 1.15      | 0.44-2.99     | 0.775          |
| Abdominal aortic aneurysm | 167          | NA†       | NA†           | NA†            |

\*Analyses were conducted using the random-effects inverse variance weighted method.

†Not applicable; too few cases for analysis.

**Table XII. Associations of alcohol consumption instrumented by 94 SNPs with stroke and atrial fibrillation in European-descent individuals in the MEGASTROKE and AFGen**

| <b>Outcome</b>       | <b>Data source</b>             | <b>OR</b> | <b>LB</b> | <b>UB</b> | <b>P value</b> |
|----------------------|--------------------------------|-----------|-----------|-----------|----------------|
| Any stroke           | MEGASTROKE                     | 1.19      | 0.99      | 1.43      | 0.061          |
| Any ischemic stroke  | MEGASTROKE                     | 1.20      | 0.98      | 1.48      | 0.077          |
| Large artery stroke  | MEGASTROKE                     | 1.24      | 0.77      | 2.02      | 0.380          |
| Small vessel stroke  | MEGASTROKE                     | 1.24      | 0.77      | 2.01      | 0.376          |
| Cardioembolic stroke | MEGASTROKE                     | 1.09      | 0.74      | 1.61      | 0.671          |
| Atrial fibrillation  | Atrial Fibrillation Consortium | 1.13      | 0.95      | 1.34      | 0.165          |

\*LB, lower bound of the 95% confidence interval for the OR; OR, odds ratio; UB, upper bound of the 95% confidence interval of the OR.

**Table XIII. Associations of alcohol intake instrumented by rs1229984 in *ADH1B* with cardiovascular disease**

| <b>Outcome</b>            | <b>Data source</b>               | <b>OR</b> | <b>LB</b> | <b>UB</b> | <b>P Value</b> |
|---------------------------|----------------------------------|-----------|-----------|-----------|----------------|
| Stroke                    | MEGASTROKE and UK Biobank        | 1.33      | 1.06      | 1.62      | 0.014          |
| Coronary artery disease   | CARDIoGRAMplusC4D and UK Biobank | 1.48      | 1.21      | 1.82      | 1.91E-4        |
| Atrial fibrillation       | Atrial Fibrillation Consortium   | 1.17      | 0.91      | 1.49      | 0.216          |
| Heart failure             | UK Biobank                       | 1.71      | 0.80      | 3.66      | 0.163          |
| Venous thromboembolism    | UK Biobank                       | 0.90      | 0.54      | 1.49      | 0.673          |
| Peripheral artery disease | UK Biobank                       | 4.91      | 1.55      | 15.57     | 0.005          |
| Aortic valve stenosis     | UK Biobank                       | 3.32      | 0.85      | 13.04     | 0.077          |
| Abdominal aortic aneurysm | UK Biobank                       | 11.79     | 1.37      | 101.18    | 0.017          |

\*LB, lower bound of the 95% confidence interval for the OR; OR, odds ratio; SNPs, single-nucleotide polymorphism; UB, upper bound of the 95% confidence interval of the OR.

**Table XIV. Associations of genetically predicted alcohol consumption instrumented by up to 93 SNPs, excluding rs1229984 in *ADH1B*, with cardiovascular disease**

| Outcome                 | Data source                    | Method                  | OR    | LB    | UB    | P Value | SNPs   |
|-------------------------|--------------------------------|-------------------------|-------|-------|-------|---------|--------|
| Stroke                  | MEGASTROKE/UK Biobank          | Univariable IVW         | 1.257 | 1.078 | 1.467 | 0.004   | 91/93* |
| Stroke                  | MEGASTROKE/UK Biobank          | Weighted median         | 1.088 | 0.870 | 1.360 | 0.462   | 91/93* |
| Stroke                  | MEGASTROKE/UK Biobank          | MR-Egger                | 1.033 | 0.714 | 1.494 | 0.863   | 91/93* |
| Stroke                  | MEGASTROKE/UK Biobank          | MR-PRESSO               | 1.257 | 1.078 | 1.467 | 0.004   | 91/93* |
| Stroke                  | MEGASTROKE/UK Biobank          | MVMR (smoking-adjusted) | 1.169 | 1.020 | 1.340 | 0.025   | 91/93* |
| Coronary artery disease | CARDIoGRAMplusC4D/UK Biobank   | Univariable IVW         | 1.073 | 0.892 | 1.290 | 0.453   | 92/93* |
| Coronary artery disease | CARDIoGRAMplusC4D/UK Biobank   | Weighted median         | 1.255 | 1.012 | 1.557 | 0.039   | 92/93* |
| Coronary artery disease | CARDIoGRAMplusC4D/UK Biobank   | MR-Egger                | 1.564 | 0.982 | 2.494 | 0.060   | 92/93* |
| Coronary artery disease | CARDIoGRAMplusC4D/UK Biobank   | MR-PRESSO               | 1.148 | 1.005 | 1.312 | 0.042   | 92/93* |
| Coronary artery disease | CARDIoGRAMplusC4D/UK Biobank   | MVMR (smoking-adjusted) | 0.955 | 0.825 | 1.105 | 0.536   | 92/93* |
| Atrial fibrillation     | Atrial Fibrillation Consortium | Univariable IVW         | 1.171 | 0.976 | 1.404 | 0.090   | 93     |
| Atrial fibrillation     | Atrial Fibrillation Consortium | Weighted median         | 1.060 | 0.843 | 1.334 | 0.619   | 93     |
| Atrial fibrillation     | Atrial Fibrillation Consortium | MR-Egger                | 1.366 | 0.869 | 2.146 | 0.176   | 93     |
| Atrial fibrillation     | Atrial Fibrillation Consortium | MR-PRESSO               | 1.213 | 1.029 | 1.431 | 0.024   | 93     |
| Atrial fibrillation     | Atrial Fibrillation Consortium | MVMR (smoking-adjusted) | 1.088 | 0.878 | 1.347 | 0.442   | 93     |
| Heart failure           | UK Biobank                     | Univariable IVW         | 0.888 | 0.582 | 1.355 | 0.581   | 93     |
| Heart failure           | UK Biobank                     | Weighted median         | 0.895 | 0.508 | 1.579 | 0.703   | 93     |
| Heart failure           | UK Biobank                     | MR-Egger                | 0.870 | 0.265 | 2.859 | 0.819   | 93     |
| Heart failure           | UK Biobank                     | MR-PRESSO               | 1.439 | 0.991 | 2.091 | 0.059   | 93     |
| Heart failure           | UK Biobank                     | MVMR (smoking-adjusted) | 1.231 | 0.791 | 1.917 | 0.357   | 93     |
| Venous thromboembolism  | UK Biobank                     | Univariable IVW         | 1.074 | 0.775 | 1.488 | 0.670   | 93     |
| Venous thromboembolism  | UK Biobank                     | Weighted median         | 0.944 | 0.634 | 1.404 | 0.776   | 93     |
| Venous thromboembolism  | UK Biobank                     | MR-Egger                | 1.089 | 0.439 | 2.700 | 0.855   | 93     |
| Venous thromboembolism  | UK Biobank                     | MR-PRESSO               | 1.061 | 0.791 | 1.424 | 0.692   | 93     |

|                           |            |                         |       |       |       |         |    |
|---------------------------|------------|-------------------------|-------|-------|-------|---------|----|
| Venous thromboembolism    | UK Biobank | MVMR (smoking-adjusted) | 0.958 | 0.734 | 1.251 | 0.754   | 93 |
| Peripheral artery disease | UK Biobank | Univariable IVW         | 2.790 | 1.683 | 4.622 | 6.87E-5 | 93 |
| Peripheral artery disease | UK Biobank | Weighted median         | 2.279 | 1.041 | 4.986 | 0.039   | 93 |
| Peripheral artery disease | UK Biobank | MR-Egger                | 5.779 | 1.406 | 23.75 | 0.015   | 93 |
| Peripheral artery disease | UK Biobank | MR-PRESSO               | 2.790 | 1.683 | 4.622 | 6.87E-5 | 93 |
| Peripheral artery disease | UK Biobank | MVMR (smoking-adjusted) | 1.522 | 0.963 | 2.408 | 0.073   | 93 |
| Aortic valve stenosis     | UK Biobank | Univariable IVW         | 0.812 | 0.418 | 1.578 | 0.540   | 93 |
| Aortic valve stenosis     | UK Biobank | Weighted median         | 1.081 | 0.378 | 3.094 | 0.884   | 93 |
| Aortic valve stenosis     | UK Biobank | MR-Egger                | 2.863 | 0.467 | 17.55 | 0.255   | 93 |
| Aortic valve stenosis     | UK Biobank | MR-PRESSO               | 0.812 | 0.418 | 1.578 | 0.540   | 93 |
| Aortic valve stenosis     | UK Biobank | MVMR (smoking-adjusted) | 0.704 | 0.402 | 1.235 | 0.221   | 93 |
| Abdominal aortic aneurysm | UK Biobank | Univariable IVW         | 2.016 | 0.833 | 4.878 | 0.120   | 93 |
| Abdominal aortic aneurysm | UK Biobank | Weighted median         | 2.408 | 0.623 | 9.310 | 0.203   | 93 |
| Abdominal aortic aneurysm | UK Biobank | MR-Egger                | 4.333 | 0.385 | 48.81 | 0.235   | 93 |
| Abdominal aortic aneurysm | UK Biobank | MR-PRESSO               | 2.016 | 0.833 | 4.878 | 0.120   | 93 |
| Abdominal aortic aneurysm | UK Biobank | MVMR (smoking-adjusted) | 1.102 | 0.496 | 2.447 | 0.812   | 93 |

\*Consortium/UK Biobank. The consortium is MEGASTROKE for stroke and CARDIoGRAMplusC4D for coronary artery disease. ADH1B, alcohol dehydrogenase 1B; CVD, cardiovascular disease; CI, confidence interval; IVW, inverse-variance weighted; LB, lower bound of the 95% CI; MR-PRESSO, Mendelian randomization Pleiotropy RESidual Sum and Outlier; MVMR multivariable Mendelian randomization; OR, odds ratio; UB, upper bound of the 95% CI; SNP, single-nucleotide polymorphism.

## REFERENCES

1. Liu M, Jiang Y, Wedow R, Li Y, Brazel DM, Chen F, Datta G, Davila-Velderrain J, McGuire D, Tian C, et al. Association studies of up to 1.2 million individuals yield new insights into the genetic etiology of tobacco and alcohol use. *Nat Genet.* 2019;51:237-244.
2. Lee JJ, Wedow R, Okbay A, Kong E, Maghziyan O, Zacher M, Nguyen-Viet TA, Bowers P, Sidorenko J, Karlsson Linner R, et al. Gene discovery and polygenic prediction from a genome-wide association study of educational attainment in 1.1 million individuals. *Nat Genet.* 2018;50:1112-1121.
3. Sudlow C, Gallacher J, Allen N, Beral V, Burton P, Danesh J, Downey P, Elliott P, Green J, Landray M, et al. UK biobank: an open access resource for identifying the causes of a wide range of complex diseases of middle and old age. *PLoS Med.* 2015;12:e1001779.
4. Malik R, Chauhan G, Traylor M, Sargurupremraj M, Okada Y, Mishra A, Rutten-Jacobs L, Giese AK, van der Laan SW, Gretarsdottir S, et al. Multiancestry genome-wide association study of 520,000 subjects identifies 32 loci associated with stroke and stroke subtypes. *Nat Genet.* 2018 50:524-537.
5. Woo D, Falcone GJ, Devan WJ, Brown WM, Biffi A, Howard TD, Anderson CD, Brouwers HB, Valant V, Battey TW, et al. Meta-analysis of genome-wide association studies identifies 1q22 as a susceptibility locus for intracerebral hemorrhage. *Am J Hum Genet.* 2014;94:511-521.
6. Nikpay M, Goel A, Won HH, Hall LM, Willenborg C, Kanoni S, Saleheen D, Kyriakou T, Nelson CP, Hopewell JC, et al. A comprehensive 1,000 Genomes-based genome-wide association meta-analysis of coronary artery disease. *Nat Genet.* 2015;47:1121-1130.
7. Roselli C, Chaffin MD, Weng LC, Aeschbacher S, Ahlberg G, Albert CM, Almgren P, Alonso A, Anderson CD, Aragam KG, et al. Multi-ethnic genome-wide association study for atrial fibrillation. *Nat Genet.* 2018;50:1225-1233.
8. Machiela MJ, Chanock SJ. LDlink: a web-based application for exploring population-specific haplotype structure and linking correlated alleles of possible functional variants. *Bioinformatics.* 2015;31:3555-3557.
9. Burgess S, Bowden J, Fall T, Ingelsson E, Thompson SG. Sensitivity analyses for robust causal inference from Mendelian randomization analyses with multiple genetic variants. *Epidemiology.* 2017;28:30-42.
10. Verbanck M, Chen CY, Neale B, Do R. Detection of widespread horizontal pleiotropy in causal relationships inferred from Mendelian randomization between complex traits and diseases. *Nat Genet.* 2018;50:693-698.
11. Burgess S, Thompson SG. Multivariable Mendelian randomization: the use of pleiotropic genetic variants to estimate causal effects. *Am J Epidemiol.* 2015;181:251-260.
12. Sanderson E, Davey Smith G, Windmeijer F, Bowden J. An examination of multivariable Mendelian randomization in the single-sample and two-sample summary data settings. *Int J Epidemiol.* 2019;48:713-727.
13. Spiller W, Davies NM, Palmer TM. Software application profile: mrrobust—a tool for performing two-sample summary Mendelian randomization analyses *Int J Epidemiol.* 2019;48:684–690.
14. Yavorska OO, Burgess S. MendelianRandomization: an R package for performing Mendelian randomization analyses using summarized data. *Int J Epidemiol.* 2017;46:1734-1739.
15. Brion MJ, Shakhbazov K, Visscher PM. Calculating statistical power in Mendelian randomization studies. *Int J Epidemiol.* 2013;42:1497-1501.
16. Nikpay M, Goel A, Won HH, Hall LM, Willenborg C, Kanoni S, Saleheen D, Kyriakou T, Nelson CP, Hopewell JC, et al. A comprehensive 1,000 Genomes-based genome-wide association meta-analysis of coronary artery disease. *Nat Genet.* 2015;47:1121-1130.
